# 1 Non-synaptic interactions between 2 olfactory receptor neurons, a 3 possible key-feature in insect odor 4 inspection

5 Mario Pannunzi<sup>1\*</sup> and Thomas Nowotny<sup>1</sup>

\*For correspondence:

[mario.pannunzi@gmail.com](mailto:mario.pannunzi@gmail.com) (MP);  
[t.nowotny@sussex.ac.uk](mailto:t.nowotny@sussex.ac.uk) (TN)

6 <sup>1</sup>School of Engineering and Informatics, University of Sussex, Brighton, UK

7

---

8 **Abstract** When flies explore their environment, they encounter odors in complex, highly  
9 intermittent plumes. To navigate a plume and, for example, find food, flies must solve several  
10 tasks, including reliably identifying mixtures of odorants and discriminating odorant mixtures  
11 emanating from a single source from odorants emitted from separate sources and mixing in the  
12 air. Lateral inhibition in the antennal lobe is commonly understood to help solving these two  
13 tasks. With a computational model of the *Drosophila* olfactory system, we analyze the utility of an  
14 alternative mechanism for solving them: Non-synaptic ("ephaptic") interactions (NSIs) between  
15 olfactory receptor neurons that are stereotypically co-housed in the same sensilla. For both tasks,  
16 NSIs improve the insect olfactory system and outperform the standard lateral inhibition  
17 mechanism in the antennal lobe. These results shed light, from an evolutionary perspective, on  
18 the role of NSIs, which are normally avoided between neurons, for instance by myelination.

19

---

## 20 Introduction

21 Flies, as most other insects, rely primarily on olfaction to find food, mates, and oviposition sites.  
22 During these search behaviours, they encounter complex plumes with highly intermittent odor  
23 signals: Odor whiffs are infrequent and odor concentration varies largely between whiffs (*Yee et al.,*  
24 *1993, 1995; Mylne and Mason, 1991*). To navigate a plume and successfully reach their objectives,  
25 flies must decipher these complex odor signals which includes several tasks: Identifying odors,  
26 whether mono-molecular or a mixture; Identifying odor intensity; Discriminating odorant mixtures  
27 emanating from a single source from those emanating from separate sources; identifying source  
28 locations, etc. Early sensory processing is understood to play an important role for completing  
29 these tasks. For instance, lateral inhibition in the antennal lobe is commonly understood to be  
30 useful for decorrelating odor signals from co-activated receptor types. Here we investigate the  
31 hypothesis that the early interactions between ORNs in the sensilla are similarly, if not more, useful  
32 for decoding information in odor plumes.

33 In both, vertebrates and invertebrates, odors are sensed by an array of numerous receptor  
34 neurons, each typically expressing receptors of exactly one of a large family of olfactory receptor  
35 (OR) types. In insects, olfactory receptor neurons (ORNs) are housed in evaginated sensilla localized  
36 on the antennae and maxillary palps (*Wilson, 2013*), each sensillum containing one to four ORNs  
37 of different types (*Todd and Baker, 1999; Wilson, 2013*). The co-location of ORN types within the  
38 sensilla is stereotypical, i.e. ORNs of a given type "a" are always co-housed with ORNs of a specific  
39 type "b". Furthermore, ORNs within the same sensillum can interact (*Shimizu and Stopfer, 2012;*

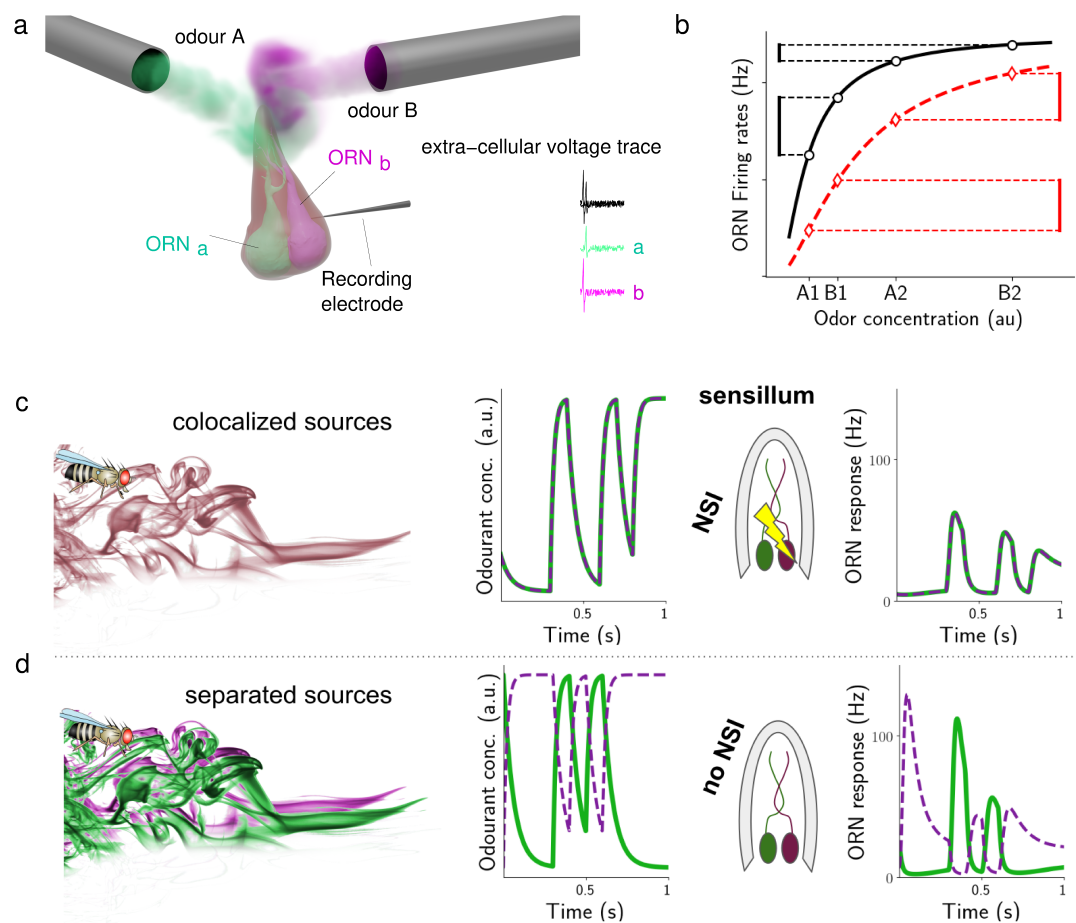

**Figure 1.** a) NSI interaction Theoretical and experimental studies have proposed that the non-synaptic interaction (NSI) between ORNs is mediated by a direct electrical field interaction between such closely apposed neurons. b) Hypothesis n.1: An inhibitory mechanism can increase the dynamic range of the ORNs and help to correctly encode the ratio between odorants even at high concentration. At low concentration, the ratio of two odorants (A1 and B1) can be encoded by ORNs, with and w/o NSI; when concentration is high (A2 and B2), the ORNs response without NSI is flattened on similar values and the ratio cannot be encoded. Hypothesis n.2: If a single source emits an odorant mixture (c), odorants will arrive in close synchronization, NSIs will take effect and the response in both ORNs is affected. If separate sources emit the odorants (d), they will arrive in a less correlated way (*Erskine, 2018*), and NSIs have almost no effect, resulting in larger ORN responses. ORN response data shown is based on a preliminary model.

40 *Su et al., 2012; Todd and Baker, 1999; Xu et al., 2019; Zhang et al., 2019*) without making synaptic  
 41 connections (see *Figure 1a*). While the interactions are sometimes called "ephaptic", referring to  
 42 their possible electronic nature, we here prefer to call them non-synaptic interactions (NSIs), for the  
 43 sake of generality. Whether stereotypical co-location of - and NSIs between - ORNs have functions  
 44 in olfactory processing and what these functions might be remains unknown, even though several  
 45 non-exclusive hypotheses have been formulated (see e.g. *Todd and Baker (1999)* and references  
 46 therein).

47 Here, we investigate two hypotheses: First, NSIs could help the olfactory system to identify ra-  
 48 tios of odorant concentrations in mixtures more faithfully by enhancing the dynamic range of ORN  
 49 responses (see *Figure 1*, panel b). Second, NSIs could help improve the spatiotemporal resolution  
 50 of odor recognition in complex plumes (see *Figure 1*, panels c-d). In both hypotheses, the NSI mech-  
 51 anism has to compete with lateral inhibition in the antennal lobe, which is commonly recognized to  
 52 fulfill these roles, even though, of course, the two mechanisms are not mutually exclusive. Indi-  
 53 rect support for the first hypothesis is found in the context of moths' pheromone communication.

54 In some moth species, pheromone mixture ratio discrimination is critical for survival and there-  
55 fore even slight changes in pheromone component ratios of 1-3% can cause significant changes in  
56 behavior. In these species, the ORNs responding to pheromone components are more likely to be  
57 co-housed. Meanwhile, when mixture ratios are not as critical for behavior, i.e., significant changes  
58 in behavior only occur if pheromone component ratios change 10% or more, ORNs are less likely  
59 to be paired in the same sensilla (see *Todd and Baker (1999)* and reference therein). The idea of  
60 extending dynamic range is a cornerstone for signal processing and metrology and we can find  
61 evidence for extended dynamics range in several senses, including olfaction (see e.g. *Vermeulen*  
62 *and Rospars (2004)*; *Reddy et al. (2018)*; *Singh et al. (2019)*): When a quantity of interest is encoded  
63 by neuronal activity through a sigmoid function (see *Olsen et al. (2010)* for an example for projec-  
64 tory neuron (PN) activity), the encoding has a limited dynamic range (see *Figure 1*, panel b) that is  
65 determined by the shape of the sigmoid and the maximum firing rate of the neurons. A common  
66 neuronal strategy to increase the dynamic range in this situation is mutual inhibition between neu-  
67 rons, like that one taking place between PNs inside the antennal lobe (AL) (see e.g. *Wilson (2013)*).  
68 We propose that NSIs in the sensilla implement such a mechanism and analyse how it improves  
69 the encoding of the concentration ratio of odor mixtures in PNs.

70 The improvement of spatiotemporal resolution of the second hypothesis can be achieved by  
71 decorrelating odor response profiles to improve odor recognition (see *Figure 1*, panels c-d), much  
72 like lateral inhibition in the antennal lobe (AL), or centre-surround inhibition in the retina. Odor-  
73 ants dissipate in the environment in complex, turbulent plumes of thin filaments of a wide range of  
74 concentrations, intermixed with clean air. Odorants emanating from the same source presumably  
75 travel together in the same filaments while odorants from separate sources are in separate strands  
76 (see e.g., *Erskine (2018)* for empirical evidence for this intuitive idea). Insects are able to resolve  
77 odorants in a blend and recognize whether odorants are present in a plume and whether or not  
78 they belong to the same filaments (*Fadamiro and Baker, 1997*; *Baker et al., 1998*; *Krofczik et al.,*  
79 *2009*; *Szyszka et al., 2012*). In the pheromone sub-system of moths, it is known that animals are  
80 able to detect, based on fine plume structure, whether multiple odorants have been emitted from  
81 the same source or not (*Fadamiro and Baker, 1997*; *Baker et al., 1998*; *Andersson et al., 2010*).  
82 In the pheromone subsystem of *Drosophila*, ORNs responding to chemicals emitted by virgin fe-  
83 males and ORNs responding to chemicals emitted by mated females are co-housed in the same  
84 sensilla: The 'virgin females ORNs' promote male approach behavior, but the 'mated females ORNs'  
85 inhibit 'virgin females ORNs' (*van Naters and Carlson, 2007*). This inhibition could be implemented  
86 through NSIs (*Todd and Baker, 1999*; *van Naters and Carlson, 2007*; *Couto et al., 2005*; *Binyameen*  
87 *et al., 2014*).

88 The experimental evidence for both hypotheses and for the general relevance of NSIs for olfac-  
89 tory processing remains mixed and research is still at an early stage. Encouraged by the available  
90 evidence, and without trying to rule out other hypotheses (for further analysis see *Discussion*), our  
91 goal is to investigate, with a computational model, the viability of the hypothesized function of  
92 NSIs between ORNs. Our computational approach helps experimental studies to refine hypothe-  
93 ses about NSI and eventually answer the pertinent question why such a mechanism that appears  
94 to duplicate what is already known to be implemented by local neurons in the AL (*Todd and Baker,*  
95 *1999*) could nevertheless provide an evolutionary advantage.

96 A number of computational models have been developed to capture different aspects of the  
97 olfactory system of insects. However, until recently, most modeling efforts were based on the as-  
98 sumption of continuous constant stimuli, which are partially realistic only for non-turbulent fluid  
99 dynamics regimes (see (*Pannunzi and Nowotny, 2019*), and reference therein). Most commonly  
100 insects encounter turbulent regimes, in which odorant concentration fluctuates rapidly (see *Fig-*  
101 *ure 6–Figure Supplement 2*).

102 To cope with these more realistic stimuli, *Kim et al. (2011)*; *Lazar and Yeh (2020)*; *Gorur-Shandilya*  
103 *et al. (2017)*; *Jacob et al. (2017)* have formulated new models of *Drosophila* ORNs, that are con-  
104 strained by experimental data obtained with more rich, dynamic odor inputs, including a model

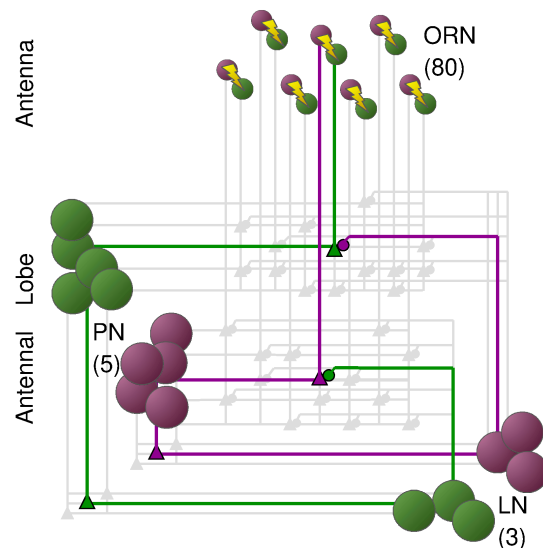

**Figure 2.** The model consists of a subset of the early olfactory system of insects from ORNs to the AL using only two groups of ORNs (ORN<sub>a</sub> and ORN<sub>b</sub>) and their respective PNs and LNs. Each ORN type, a and b, is tuned to a specific set of odorants (e.g. individual pheromone component) and converges onto its corresponding PNs. PNs impinge into their respective LNs, but receive inhibitory input from LNs of the other type.

105 simulating ORNs and PNs that are subject to input from simulated plumes (*Jacob et al., 2017*) with  
106 statistical properties akin to those of naturalistic plumes (see more details in *Model and methods*  
107 and *Correlation detection in long realistic plumes*).

108 Here, we present a network model with two groups of ORNs, each tuned to a specific set of  
109 odorants, connected to their corresponding glomeruli, formed by lateral neurons (LNs) and PNs,  
110 following the path started by *Av-Ron and Rospars (1995)*; *Av-Ron and Vibert (1996)*, and subse-  
111 quently by *Getz and Lutz (1999)*; *Serrano et al. (2013)*; *Zavada et al. (2011)*. We model the ORNs  
112 in a similar approach as *Kim et al. (2011)*; *Lazar and Yeh (2020)* with minor differences in the filter  
113 properties and the adaptation (see *Model and methods*). We have tested the behavior of this net-  
114 work in response to simple reductionist stimuli (as commonly used in the literature, see above),  
115 and simulated naturalistic mixtures plumes (as described by the experiments in *Mylyne and Mason*  
116 *(1991)*; *Yee et al. (1995)*). We then used this simple but well-supported model to investigate the  
117 role of NSIs for odor mixture recognition.

## 118 Results

119 To investigate the role of NSIs in olfactory sensilla, we have built a computational model of the  
120 first two processing stages of the *Drosophila* olfactory system. In the first stage, ORN responses  
121 are described by an odor transduction process and a spike generator (see *Model and methods*),  
122 in line with previous experimental and theoretical studies (*Kim et al., 2011, 2015*; *Martelli et al.,*  
123 *2013*; *Lazar and Yeh, 2020*). We simulated pairs of ORNs expressing different OR types, as they  
124 are co-housed in sensilla. NSIs between co-housed pairs effectively lead to their mutual inhibition  
125 (see *Figure 1a*). The second stage of olfactory processing occurs in the AL, in which PNs receive  
126 input from ORNs and form local circuits through LNs. ORNs of the same type all make excitatory  
127 synapses onto the same associated PNs. PNs excite LNs which then inhibit PNs of other glomeruli  
128 but not the PNs in the same glomerulus (see *Figure 2* and *Model and methods* for further details).

129 For maximum clarity, we here focus on only one type of sensillum and hence two types of ORNs  
130 that we denote as ORN<sub>a</sub> and ORN<sub>b</sub>. We further assume that odorants labeled A and B selectively  
131 activate ORN<sub>a</sub> and ORN<sub>b</sub>, respectively (see *Figure 2* and *Figure 1a*). This assumption is not only  
132 sensible for a reductionist analysis of the role of NSIs, but it is also based on experimental obser-  
133 vations. For instance, pheromone receptors in moths and in *Drosophila* are highly selective, paired

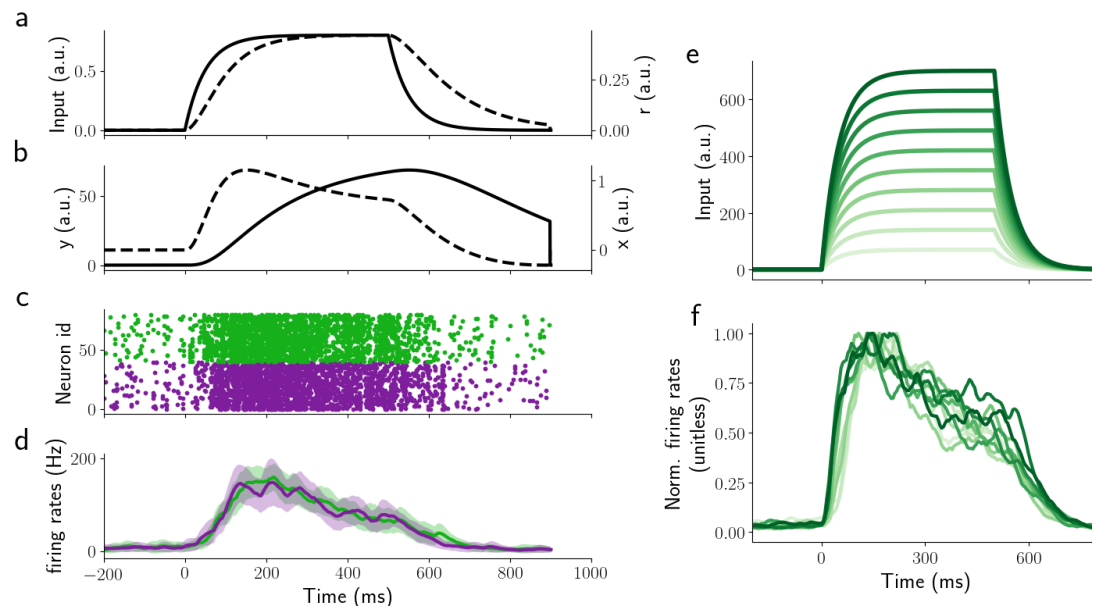

**Figure 3.** ORN responses to a 500ms single step stimulus. a) Stimulus waveform (continuous line) and receptor activation  $r$  (dashed). b) Activity of the internal ORN variables  $x$  (continuous) and  $y$  (dashed) (see Model and methods). c) Example spike raster of the spiking response of all 80 ORNs. d) Spike density function of the ORN population activity. The Shaded area represents the standard deviation across the ORNs of the same type. Color code for panels c-d: green for  $ORN_a$  and purple for  $ORN_b$ . e) Stimulus waveforms for different odorant concentrations. f) ORN activity normalized to the peak activity. odor concentration is indicated with different shades of green. After normalization, the responses are almost identical to those reported by *Martelli et al. (2013)*.

**Figure 3–Figure supplement 1.** Model ORN response to a single step, a ramp, and a parabola as in (*Lazar and Yeh, 2020*).

**Figure 3–Figure supplement 2.** Output of the model of Lazar and Yeh (*Lazar and Yeh, 2020*) for comparison.

134 in sensilla, and exhibit NSIs (*Leal, 2013; Todd and Baker, 1999*). In the general olfactory system of  
 135 *Drosophila*, neurons ab3A and ab3B in sensillum ab3 are selectively sensitive to 2-heptanone and  
 136 Methyl hexanoate, and when stimulated simultaneously they inhibit each other through NSIs (*Su*  
 137 *et al., 2012*).

### 138 **Constraining the ORN model to biophysical evidence**

139 In this investigation we are particularly interested in the complex time course of odorant responses  
 140 and have therefore focused on replicating realistic temporal dynamics of the response of ORNs at  
 141 multiple time scales. ORN responses were constrained with experimental data obtained with delta  
 142 inputs, i.e. inputs of very short duration and very high concentration, and random Gaussian pulses,  
 143 i.e. series of input pulses which durations and inter-stimulus-intervals were drawn from a Gaussian  
 144 distribution. We found that our model reproduces the data to a similar quality (relative error of  
 145 around 6%) as previous linear-nonlinear models (*Kim et al., 2011, 2015; Martelli et al., 2013; Nagel*  
 146 *and Wilson, 2011; Lazar and Yeh, 2020*), even though it has fewer free parameters (see *Figure 3*).

147 To further constrain the model, we compared its results to electrophysiological recordings from  
 148 ORNs (*Kim et al., 2011, 2015*) responding to 2 s long odor stimuli with shapes resembling steps,  
 149 ramps, and parabolas (see *Figure 3–Figure Supplement 1* and Model and methods). The model  
 150 reproduces all key properties of the experimentally observed ORN responses. For the step stim-  
 151 uli, ORN activity peaks around 50ms after stimulus onset and the peak amplitude correlates with  
 152 the odor concentration (*Figure 3–Figure Supplement 1b*). After the peak, responses gradually de-  
 153 crease to a plateau. Furthermore, if normalised by the peak value, responses have the same shape  
 154 independently of the intensity of the stimulus (*Martelli et al., 2013*), see *Figure 3e,f*. For the ramp

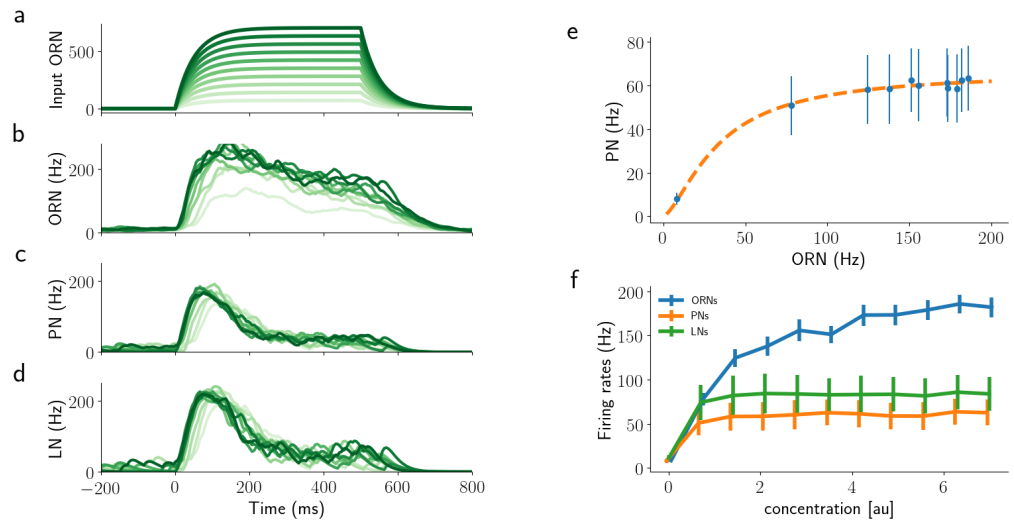

**Figure 4.** Network response to 500 ms step stimuli of a single odorant for the network as shown in *Figure 2*. a) Step stimuli, shade of green indicates concentration. b)-d) corresponding activity of ORNs, PNs, and LNs. Shades of green match the input concentrations. e) Average response of PNs over 500 ms against the average activity of the corresponding ORNs. The orange dashed line is the fit of the simulated data using equation eq.1 as reported in (*Olsen et al., 2010*). f) Average values for PNs, ORNs, and LNs for different values of concentration. Error bars show the SE over PNs.

**Figure 4-Figure supplement 1.** Similar results for shorter stimulation time (50 ms).

**Figure 4-Figure supplement 2.** Similar results for shorter stimulation time (100 ms).

155 stimuli, ORN responses plateau after an initial period of around 200 ms, encoding the steepness  
 156 of the ramp (*Figure 3-Figure Supplement 1d*). More generally, ORN responses seem to encode  
 157 the rate of change of the stimulus concentration (*Kim et al., 2011, 2015; Nagel and Wilson, 2011*).  
 158 Accordingly, ORN activity in response to the parabolic stimuli is like a ramp (*Figure 3-Figure Sup-*  
 159 *plement 1f*).

### 160 Model behavior for an isolated stimulus

161 Without further constraining the model we then tested PN responses with a single constant step  
 162 stimulus. *Olsen et al. (2010)* reported that the response of PNs to such a stimulus is best described  
 163 by a sigmoid,

$$v_{PN} = v_{\max} \frac{v_{\text{ORN}}^{1.5}}{\sigma^{1.5} + v_{\text{ORN}}^{1.5}} \quad (1)$$

164 where  $v_{\max}$  is the maximum firing rate of ORNs,  $\sigma$  is a fitted constant representing the level of ORN  
 165 input that drives half-maximum response, and  $v_{\text{ORN}}$  and  $v_{\text{PN}}$  are the average firing rates of the ORNs  
 166 and the PN over the stimulation period (500 ms), respectively. Our model reproduces this behavior  
 167 as a direct consequence of the model structure without any further parameter tuning (*Figure 4*).  
 168 LNs follow the same behavior (see *Figure 4f*). Note that this result, i.e. the sigmoidal behavior,  
 169 generalizes to both, shorter stimulation times (50 and 100 ms, see *Figure 4-Figure Supplement 1*  
 170 and *Figure 4-Figure Supplement 2*) and to the peak activity instead of the time averaged activity  
 171 (data not shown).

172 With a model in place that demonstrates the correct response dynamics for a variety of stimuli,  
 173 we then analysed its predictions on whether NSIs can be beneficial for odor mixture processing. In  
 174 particular, we tested the following two hypotheses: 1. Do NSIs improve the encoding of concentra-  
 175 tion ratio in an odorant mixture (see section Odorant ratio in synchronous mixture stimuli) and 2.  
 176 Do NSIs support differentiating mixture plumes from multiple versus single source scenarios (see  
 177 section Processing asynchronous odor mixtures)?

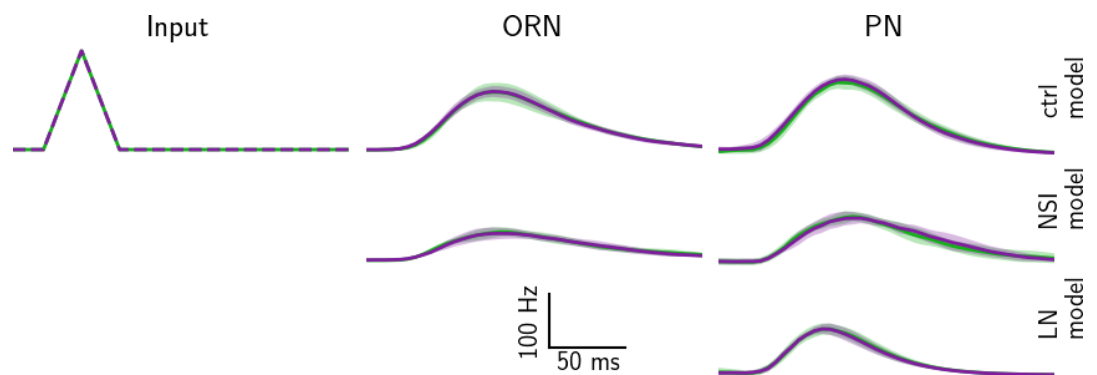

**Figure 5.** Time course of ORN (2nd column), and PN activity (3rd column) in response to a triangular pulse (50 ms, 1st column) for the three models – control (top row), NSI (second row) and LN model (bottom row). Green and purple lines are for glomerulus a and b, respectively. Input to the three models is identical, while control and LN models have identical ORN activity, which is therefore not displayed twice. Peak PN activity for the control-model is around 110 Hz (top row), and around 70 Hz for the NSI- and LN models. The lines show the average response and the shaded area around the lines the standard deviation over 10 trials.

### 178 Odorant ratio in synchronous mixture stimuli

179 Airborne odors travel in complex plumes characterized by highly intermittent whiffs and highly  
180 variable odor concentration (*Mylne and Mason, 1991; Yee et al., 1995*). To successfully navigate  
181 such plumes and find for example food, flies must recognize relevant whiffs regardless of the over-  
182 all odor concentration in them, i.e. perform concentration-independent odorant ratio recognition.  
183 This is a difficult problem as 1. PN responses are sigmoidal with respect to concentration and 2.  
184 the sigmoids are not the same for different odorants in a mixture and different receptor types. To  
185 investigate this problem and understand whether NSIs may play a role in solving it, we stimulated  
186 the model ORNs with binary mixtures, varying the overall concentration of the mixture, the concen-  
187 tration ratio, and the onset time of the two odorants. As a first approximation we mimic the whiffs  
188 in plumes (see e.g. *Figure 6-Figure Supplement 2a*) with simple triangular odorant concentration  
189 profiles that have a symmetric linear increase and decrease (see *Figure 5*). We first analysed the  
190 synchronous case where both odorants in the mixture arrive at the same time, which is typical  
191 when a single source emits both odorants (see *Figure 7-Figure Supplement 1 a*, extracted from  
192 *Erskine (2018)*). To assess the role of NSIs, we compared the model with NSIs (“NSI model”) to a  
193 model with lateral inhibition between PNs mediated by LNs in the AL (“LN model”) and a control  
194 model where the pathways for different OR types do not interact at all (“control model”).

195 *Figure 5* shows the typical effects of the two mechanisms on PN responses. For the purpose  
196 of this figure we adjusted the NSI strength and LN synaptic conductance (see Table 1) in such a  
197 way that the average PN responses to a synchronous mixture pulse were matched across the two  
198 models. While the stimulus lasts only 50 ms, the effect on ORNs, PNs and LNs lasts more than twice  
199 as long. We observed the same behavior for other stimulus durations (tested from 10 to 500 ms). In  
200 the control model (*Figure 5*, top row), PN and LN responses are unaffected by lateral interactions  
201 between OR-type specific pathways and because we have matched the sensory response strength  
202 of the two odorants and OR types for simplicity, the responses of the PN in the two glomeruli are  
203 very much the same. For the LN model the response of ORNs is unaltered by network effects and  
204 synaptic inhibition of LNs is the only lateral interaction between pathways (*Figure 5* bottom). For  
205 the NSI model (*Figure 5* middle row) ORN activity is directly affected by NSIs and the activity of PNs  
206 is lower than in control conditions as a consequence of the lower ORN responses. As explained  
207 above, NSI strength and synaptic conductance of LN inhibition were chosen in this example so  
208 that the response of the PNs for both models is of similar magnitude (peak response for PNs for  
209 independent glomeruli ~110 Hz, for AL lateral inhibition and NSI mechanism ~70 Hz).

210 To investigate the effectiveness of the two mechanisms for ensuring faithful odorant ratio en-

211 coding more systematically, we tested the three models with synchronous triangular odor pulses  
212 of different overall concentration, different concentration ratios, and for different values of stimu-  
213 lus duration (from 10 to 200 ms), which we selected to match the range of common whiff durations  
214 observed experimentally (see **Figure 6–Figure Supplement 2**). Here, and throughout the study we  
215 explored several values for the two strength parameters (1, 2, 3, 6,10, 13, 16 for  $\omega_{NSI}$  and (0.2, 0.3,  
216 0.4 for  $\alpha_{LN}$ ) and for each analysed task we report the results of the best performing NSI and LN  
217 model, respectively.

218 The results are summarised in **Figure 6**. Due to the fundamentally sigmoidal PN responses for  
219 increasing odorant concentration (see **Figure 4e**), the encoding of the ratio between two odorants  
220 in a mixture is distorted in the absence of additional mechanisms (as seen in the control model,  
221 **Figure 6a,b**). The encoding of odorant mixtures is indeed already disrupted at the level of the ORNs  
222 (**Figure 6a**), not only on the level of PNs (**Figure 6b**). Once activated, inhibitory interactions between  
223 PNs mediated by LNs improve ratio encoding (**Figure 6c,d**) but only for a very limited range of stimu-  
224 lus concentrations: Essentially only for the concentration 0.6, the response ratio of PNs reasonably  
225 follows the diagonal. For other concentration values, LN inhibition is either too strong (diverging  
226 response ratio) or too weak (flat response ratio). We explored a wide range of values for  $\alpha_{LN}$ , the  
227 synaptic efficacy of LN to PN synapses, and found that different values of  $\alpha_{LN}$  lead to successful ra-  
228 tio encoding for different individual concentration values but that the overall qualitative behavior  
229 was unchanged. In other words, stronger or weaker LN inhibition does not improve ratio encod-  
230 ing in PN activity across more than one input concentration value. The NSI mechanism instead  
231 changes the ORN responses (**Figure 6e**), and as a consequence, PN responses change so that their  
232 activity reflects the ratio of odor concentrations better for most of the tested concentration ratios  
233 (**Figure 6f**).

234 The results in **Figure 6** are all based on the ratio of peak activity  $R^{PN} = v_b^{PN}/v_a^{PN}$  (see Model  
235 and methods) during the first 100ms after the stimulus onset. We also tested the ratio of average  
236 activity over the duration of the stimuli and found very similar results (see **Figure 6–Figure Supple-**  
237 **ment 1**). In the same vein, testing with longer stimuli also yielded qualitatively similar results.

238 Next, we tested the encoding of ratios – besides for different concentrations – also for differ-  
239 ent whiff durations (**Figure 6g**). For very short stimuli (10 ms), the sigmoidal dependence of PN  
240 responses on concentration does not yet have pronounced effects, and therefore ratio encoding  
241 is easier in the control model. However, the LN model over-compensates, leading to errors for  
242 all concentrations. In the NSI model the coding is as good as in control. For short stimuli (20 ms),  
243 the encoding in the control model begins to degrade, while the LN model improves for larger con-  
244 centrations. The NSI model does best across all concentrations. For medium to very long stimu-  
245 li (50 ms,100 ms) encoding in the LN model begins to break down again for larger concentrations  
246 while the NSI model exhibits constant coding quality. While very intuitive, encoding mixture ratios  
247 linearly in PN firing rates is not the only option. To analyse encoding quality more generally, we  
248 therefore repeated our analysis by calculating the mutual information (MI) between the odorant  
249 concentration and  $R^{PN}$ . The results from the analysis of the MI are qualitatively similar to the  
250 results with the coding error (see **Figure 6–Figure Supplement 3**).

251 From this analysis it is evident that both NSI and AL inhibition lead to better ratio encoding  
252 than the control model for medium to long stimuli of high concentration. However, for the LN  
253 model this comes at the price of degraded ratio encoding at shorter stimulus durations and lower  
254 concentrations. Only the NSI model, albeit not perfect, improves ratio encoding consistently across  
255 all tested combinations for duration and concentration.

256 In the next section we will explore the effectiveness of the different models when the whiffs  
257 arrive asynchronously.

## 258 **Processing asynchronous odor mixtures**

259 When odorants are released from separate sources, they form a plume in which the whiffs of dif-  
260 ferent odorants typically are encountered at distinct onset times. To the contrary, when a mixture



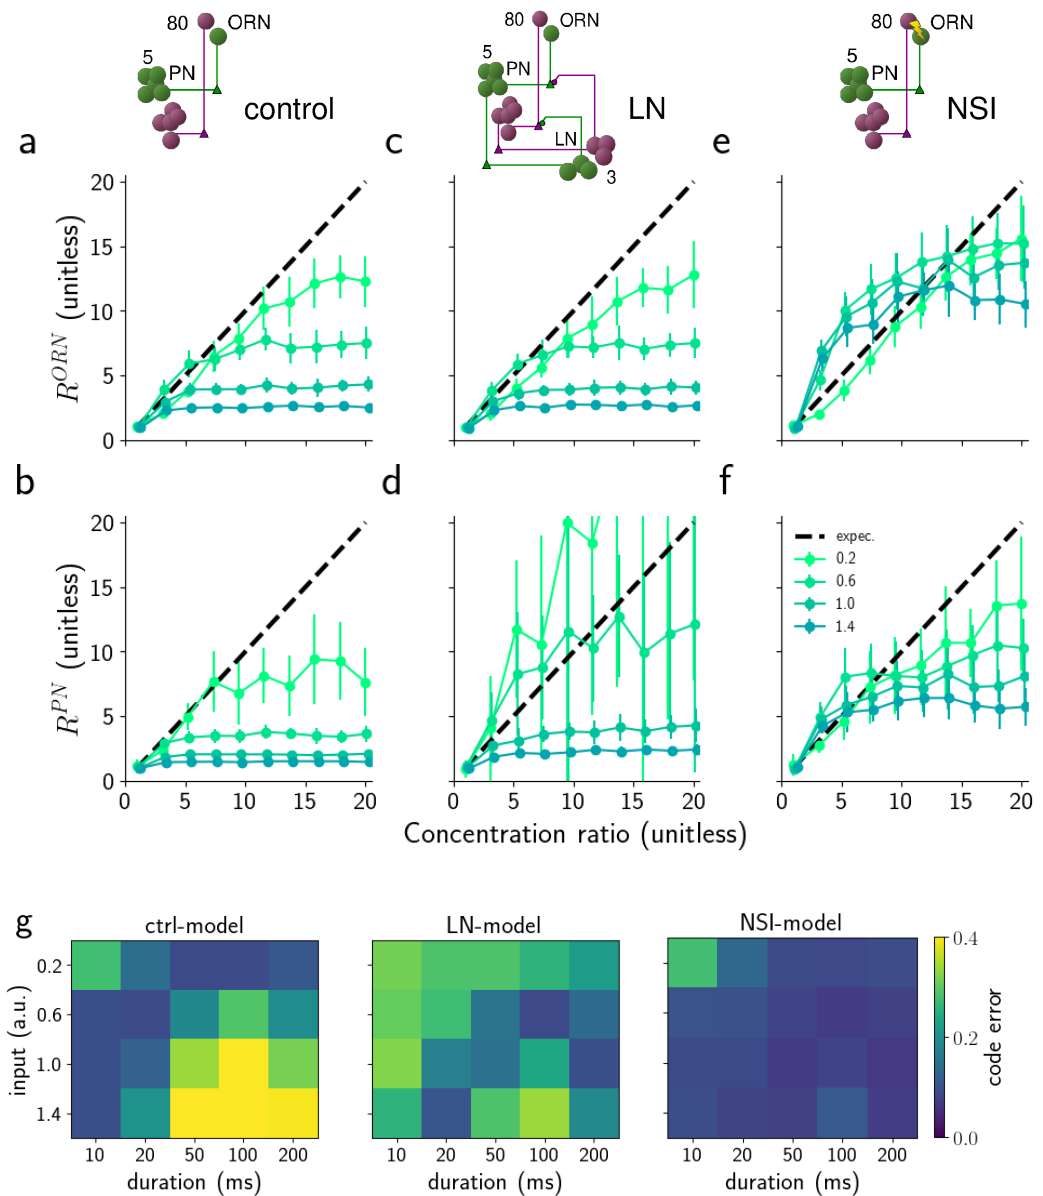

**Figure 6.** Encoding concentration ratio with peak PN activity. ORN (a,c,e) and PN (b,d,f) responses ratio ( $R^{ORN} = v_b^{ORN}/v_a^{ORN}$  and  $R^{PN} = v_b^{PN}/v_a^{PN}$ ) to a single synchronous triangular pulse of 50ms duration applied for both ORN groups. The graphs show response ratios versus concentration ratio of the two odorants for four different overall concentrations (colours, see legend in f). The peak PN responses would be a perfect reflection of the odorant concentration if they followed the black dashed diagonal for all concentrations. Error bars represent the semi inter-quartile range calculated over 50 trials. g) Analysis of the coding error for different values of stimulus duration (from 10 to 200ms) and concentration values (0.2 to 1.4). The coding error is calculated as the squared relative distance (see Model and methods).

**Figure 6-Figure supplement 1.** Encoding ratio with the average PN activity.

**Figure 6-Figure supplement 2.** Plume statistics of natural plumes.

**Figure 6-Figure supplement 3.** Encoding ratio analysis with MI.

of odorants is released from a single source they form a plume where the odorants typically arrive together (**Figure 7–Figure Supplement 1**). We hypothesise that if lateral inhibition (via LNs or NSIs) only takes effect in the synchronous case but not in asynchronous case, it will help distinguishing single source and multi-source plumes. For instance, in the case of pheromone receptor neurons that are co-housed with receptor neurons for an antagonist odorant, the response to the pheromone would be suppressed by NSI when both odorants arrive in synchrony (same source) and not when arriving with delays (the pheromone source is separate from the antagonistic source). This is thought to underlie the ability of male moths to identify a compatible female, where the antagonist odorant is a component of the pheromone of a related but incompatible species **Baker et al. (1998)**. To test whether this idea is consistent with the effect of NSIs as described by our model, we calculated the predicted responses of PNs to asynchronous whiffs of two odorants in our three models - control, with LN inhibition, and with NSI.

**Figure 7a** shows the responses in the models for the example of two 50 ms triangular odor pulses of the same amplitude and at 100 ms delay. We chose stimuli that excite the two ORN types with the same strength to simplify the analysis and focus on the differences between models with respect to asynchronous input rather than differing input ratios that we analyzed above. In the control model, responses are very similar between ORN<sub>a</sub> and ORN<sub>b</sub>, as well as PN<sub>a</sub> and PN<sub>b</sub> as expected in the absence of interactions and for identical stimulus strength.

The situation is very different when LN inhibition is present (**Figure 7a**, bottom). Even for the comparatively large delay of 100 ms – the second stimulus starts 50 ms after the first one ends – the excitatory input to PN<sub>b</sub> (purple) cannot overcome the inhibition coming through the LNs activated by PN<sub>a</sub> (green). This is a consequence of PN and LN responses outlasting the stimuli as observed above. In contrast, while an inhibitory effect is present in the NSI model, it is much weaker, with only small effects at the PNs (**Figure 7**, middle row).

To quantify the differences between the three models across different typical conditions, we calculated the ratio between the PN responses of the two glomeruli  $R^{PN} = v_b^{PN} / v_a^{PN}$ , both for the peak activity and for the average activity over the stimulation time. **Figure 7b** shows the results for stimulus durations between 10 and 200 ms and delays from 0 to 500 ms. The whiff durations and delays were selected to match the range of values commonly observed in experiments (see **Figure 6–Figure Supplement 2**).

As expected, the value of  $R^{PN}$  is close to 1 (pink lines) for the control model with independent ORNs and PNs and all explored parameters. In contrast, the NSI model and the LN model exhibit clear effects of their lateral interactions. In the LN model the response of the second PN<sub>b</sub> is strongly suppressed by the response to the first stimulus for all tested whiff durations and delays. The NSI model also shows suppression but the effects are smaller and only present for very long whiffs (200 ms) and commensurate or shorter delays (<250 ms). This is a clear advantage over the LN model. The results are very similar whether measured in terms of the peak activity (**Figure 7b**) or the average activity over the stimulus duration (**Figure 7–Figure Supplement 2**).

### Correlation detection in long realistic plumes

So far we have seen that NSIs are beneficial for ratio coding in synchronous mixtures and that they distort responses less than LN inhibition in the case of asynchronous mixtures. In this final section, we investigated and compared the effects of the two mechanisms when the system is stimulated with more realistic signals of fluctuating concentrations that have statistical features resembling odor plumes in an open field (see **Figure 6–Figure Supplement 2**). The statistics of the plumes and how we simulated them are described in detail in the Model and methods; in brief, we replicated the statistical distribution of the duration of whiffs and clean air and the distribution of the odorant concentration which were reported in the literature (**Mylne and Mason, 1991; Yee et al., 1995**). Similarly to **Jacob et al. (2017)**, we simulated plumes as pairs of odorant concentration time series, with a varying degree of correlation to emulate plumes of odors emitted from a single or from two separate sources (see **Erskine (2018)** and **Figure 7–Figure Supplement 1**). Similar to the

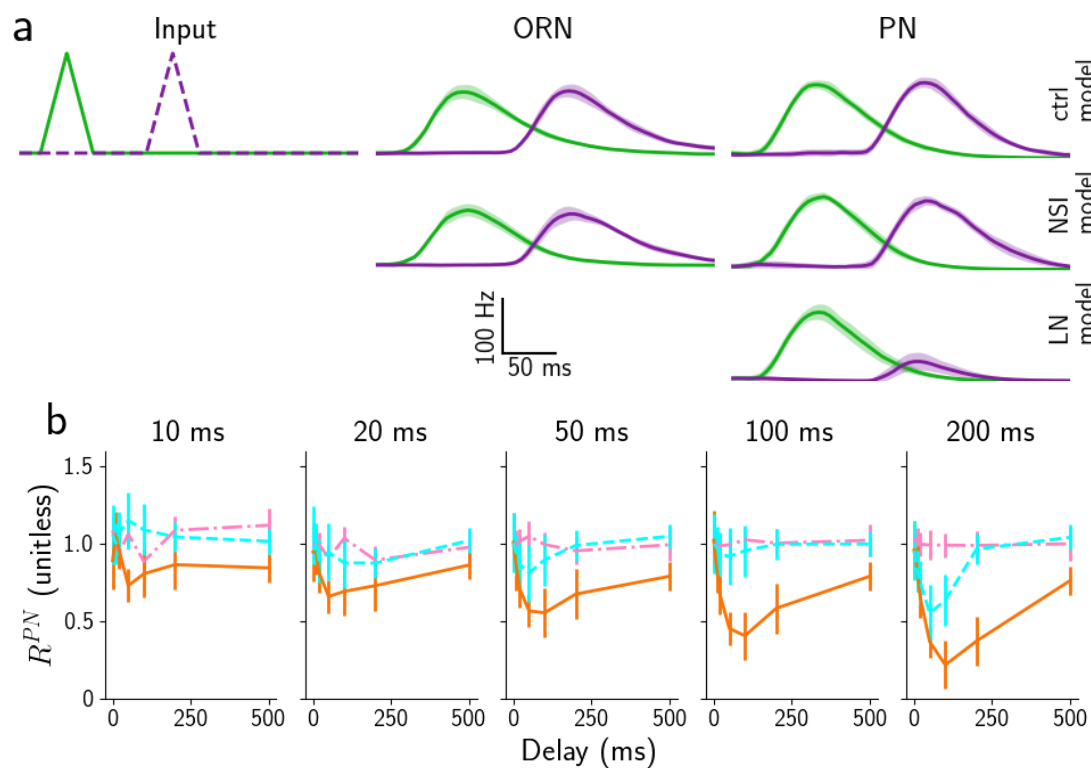

**Figure 7.** Asynchronous mixture encoding. a) Stimulus concentration ("Input", first column), and the response of ORNs (second column) and PNs (third column). The lines are the average response, and the shaded areas mark the standard deviation calculated over 10 trials. The PN peak activity for the control-model (top row) is  $\sim 150$  Hz for both glomeruli, for the LN model (bottom row)  $\sim 50$  Hz for the second glomerulus and for the NSI model (middle row)  $\sim 130$  Hz for the second glomerulus. b) Median ratio of the peak PN responses of the two glomeruli  $R^{PN} = v_b^{PN} / v_a^{PN}$  in the three models: control model (dot dashed pink), LN model (orange continuous), and NSI model (dashed cyan) for different stimulus durations as marked on the top. Error bars represent the semi inter-quartile ranges.

**Figure 7-Figure supplement 1.** Example concentration fluctuation time series for two odorants emitted by a single source or two separate sources

**Figure 7-Figure supplement 2.** Results for the average PN response over the stimulus duration.

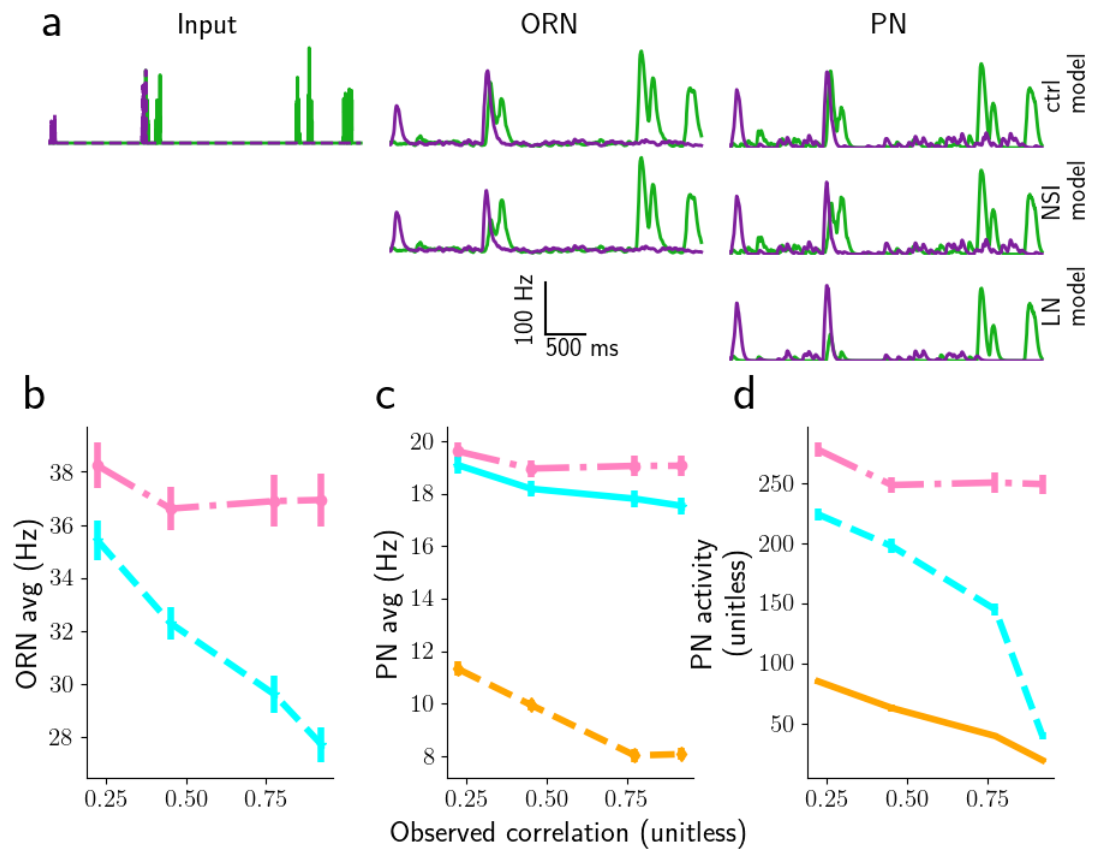

**Figure 8.** a) Time course of stimulus concentration (Input ORN, first column), and response of ORNs (second column), PNs (third column) to two 4 s long realistic plumes with statistical properties as described in the text; first row: control model, second row: NSI model, third row: LN model. Lines are the mean and shaded areas around the lines the standard deviation over 10 trials. b) Response of ORNs, and c) response of PNs averaged over 200 s for the three models: control model (dot dashed pink), LN model (orange continuous), and NSI model (dashed cyan). The observation from the LN model is not shown in panel b as it overlaps with the dot dashed pink lines (ctrl-model). d) Total PN activity above 150 Hz, for 3 ms maximum whiff durations.

**Figure 8-Figure supplement 1.** Statistical properties of simulated natural plumes

**Figure 8-Figure supplement 2.** Similar results of panel d with different thresholds (50, 100, 150 Hz)

311 previous section, the stimuli were applied to the models and we analyzed the PN responses in order  
 312 to understand the ability of the early olfactory system to encode the signal. PN responses are very  
 313 complex time series (see *Figure 8*) and many different decoding algorithms (*Huerta et al., 2004*;  
 314 *Nowotny et al., 2005*; *Jortner et al., 2007*; *Lin et al., 2007, 2014*), could be present in higher brain  
 315 areas to interpret them. However, as before, we applied the simple measure of peak PN activity in  
 316 terms of the total firing rate above a given threshold to analyze the quality of the encoding.

317 In order to analyze the discrimination of plumes with odorants coming from a single source  
 318 – highly correlated stimuli – from separate sources – poorly correlated stimuli – we developed a  
 319 method to generate plumes of a prescribed correlation between concentration time series while  
 320 keeping other properties such as intermittency and average odorant concentration constant (see  
 321 Model and methods and *Figure 8-Figure Supplement 1*). Using this method, we then explored  
 322 plumes with correlation 0 to very close to 1. We simulated the model for 200 s duration (a few  
 323 times the maximal timescale in plumes, i.e. 50 s) and preset correlations between the odorant con-  
 324 centration time series, and first inspected the average activity of neuron types over the stimulation  
 325 period. By construction, the ORN activity for the LN model is the same as in the absence of inhibi-  
 326 tion (*Figure 8a-b*), while the average ORN activity for the NSI model is lower and depends on the  
 327 correlation between odor signals (*Figure 8a-b*). These effects are approximately the same for the

328 whole range of the tested NSI strengths  $\omega_{NSI}$  (data not shown).

329 The situation is different for the average PN activity. The average PN response in the NSI model  
330 is almost the same as in the control model and only weakly, if at all, dependent on input correlation  
331 (see **Figure 8c**). It, therefore, does not encode input correlation well. To the contrary, the average  
332 PN responses in the LN inhibition network are lower than in the control model, and a bit more  
333 clearly dependent on input correlation (**Figure 8c**). Hence, LN inhibition is useful for encoding  
334 input correlation with the average PN activity. All reported effects remain approximately the same  
335 for the entire range of explored parameters ( $\omega_{NSI}$  and  $\alpha_{LN}$ ) (data not shown).

336 We next analysed instead of the average PN response the “peak PN” response, defined as the  
337 integrated PN activity over time windows where the PN firing rate is above a given threshold (e.g. 50,  
338 100, or 150 ms). **Figure 8d** shows peak PN for 150 Hz threshold (see **Figure 8–Figure Supplement 2** for  
339 plots with other underlying thresholds). For the LN model and the NSI model, peak PN responses  
340 depend on the plume correlation. Within the values we investigated, the highest peak threshold of  
341 150 Hz recovers the most information about input correlation and for high peak thresholds the NSI  
342 mechanism leads to more informative responses than LN inhibition. We conclude that most  
343 of the information about input correlations is contained in the first part of the response before  
344 adaptation takes place and that therefore the average activity over the entire response is not a  
345 good proxy for encoding the correlations in the input signals.

346 So far we have used simulated plumes corresponding to 60 m distance from the source. At  
347 different distances the maximum whiff durations will vary (**Pannunzi and Nowotny, 2019**). We  
348 therefore asked whether and how the efficiency of the two mechanisms depends on maximum  
349 whiff duration and hence distance from the source. To address this question, we generated plumes  
350 with different maximum whiff duration,  $w_{max}$ . **Figure 9a** shows a plot for each tested value of  $w_{max}$   
351 (from 0.01 to 50 m) for peak threshold 150 Hz (see **Figure 9–Figure Supplement 1** and **Figure 9–Figure**  
352 **Supplement 2** for results with peak thresholds of 50, and 100 Hz). The choice of maximum whiff  
353 durations reflects typical experimental observations (**Yee et al., 1995**).

354 There are two effects that are evident: 1. At zero correlation between the stimuli, PN responses  
355 in the NSI model are quite similar to those in the control model while those in the LN model differ  
356 more, and 2. The PN responses in the NSI model depend more strongly on the input correlations of  
357 the stimuli than the PN activities in the LN model, especially for short (<3s) whiffs (**Figure 9a**) which  
358 constitute more than 90% of all typical whiff durations. This second effect is important because  
359 ideally we would like the PN responses to differ maximally between highly correlated plumes and  
360 independent plumes in order to discern the two conditions.

361 To quantify these effects we measured the following distances: 1. The distance between peak  
362 PN of the NSI model (or LN model) and of the control model at zero correlation, defined as  $p_{ctrl}^0 - p_x^0$   
363 with  $x \in \{NSI, LN\}$  (**Figure 9b**) and 2. the distance between peak PN of NSI model (or LN model) at  
364 0 correlation and at correlation (very close to) 1, defined as  $p_x^0 - p_x^1$  with  $x \in \{NSI, LN\}$  (**Figure 9c**).  
365 These figures show the clear advantage of using an NSI mechanism instead of LN inhibition when  
366 encoding the correlation between stimuli that resemble a naturalistic plume:  $p_{ctrl}^0 - p_{NSI}^0$  is always  
367 always smaller than  $p_{ctrl}^0 - p_{LN}^0$  and  $p_x^0 - p_{NSI}^1$  is consistently larger than  $p_x^0 - p_{LN}^1$ .

## 368 Discussion

369 *“Thought experiment is in any case a necessary precondition for physical experiment. Every experimenter*  
370 *and inventor must have the planned arrangement in his head before translating it into fact.”* E. Mach  
371 (1905)

372 We have implemented a model of the early olfactory system comprising ORNs of two receptor  
373 types, their NSIs in the sensillum, and two corresponding glomeruli in the AL, containing PNs and  
374 LNs in roughly the numbers that have been observed for *Drosophila*. Our objective was to inves-  
375 tigate two potential roles of NSIs in insects’ olfactory processing: Concentration invariant mixture  
376 ratio recognition, vital for insects to identify the type or state of an odor source (see e.g. (**Visser**

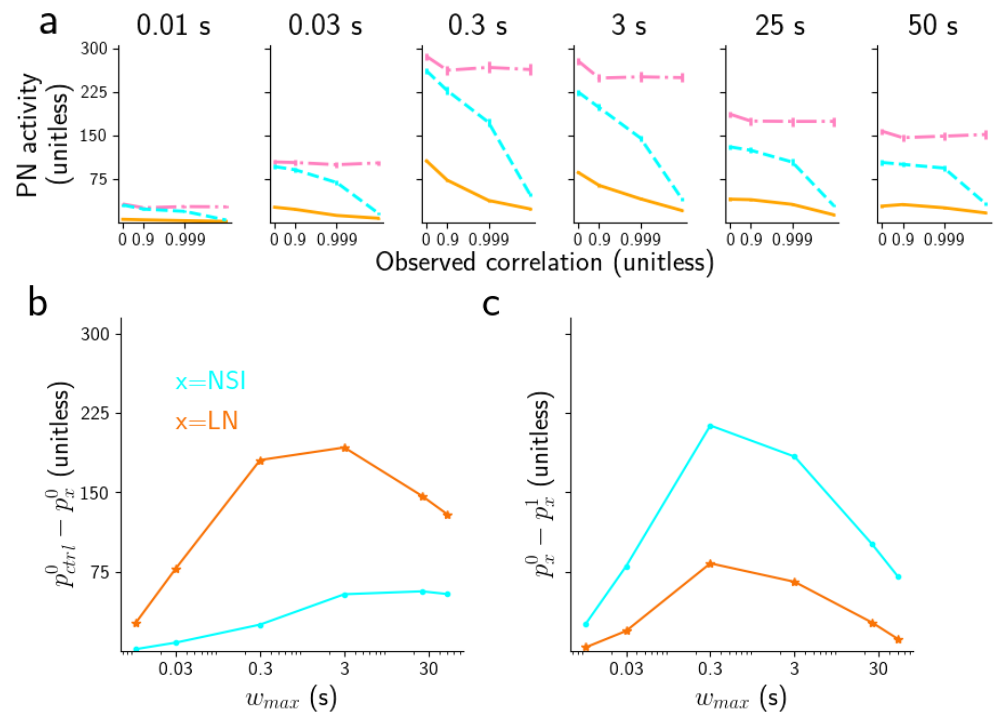

**Figure 9.** a) Peak PN for threshold 150 Hz, and for different subsets of whiff durations (from 0.01 to 50s) for the three models: control model (dot dashed pink), LN model (orange continuous), and NSI model (dashed cyan). Note that the horizontal axis has a log-scale. b) Distance between the PN activity of the control model and the NSI model (or LN model), at 0 correlation,  $p_{ctrl}^0 - p_x^0$  with  $x \in \{NSI, LN\}$ . c) Distance between the PN activity of NSI model (or LN model) at 0 correlation and at correlation 1,  $p_x^0 - p_x^1$  with  $x \in \{NSI, LN\}$ .

**Figure 9-Figure supplement 1.** Similar results using threshold 50 Hz

**Figure 9-Figure supplement 2.** Similar results using threshold 100 Hz

377 *and Avé, 1978; Christensen et al., 1989; Natale et al., 2003; Bruce et al., 2005; Najjar-Rodriguez*  
378 *et al., 2010)* and references therein) and odor source separation, which can be critical for insects,  
379 e.g. in the context of finding mates *Baker et al. (1998); Fadamiro and Baker (1997); van Naters and*  
380 *Carlson (2007)*. This second function requires high spatiotemporal resolution of odor recognition  
381 in complex plumes.

382 By comparing our model with NSIs to a control model without lateral interactions between  
383 pathways for different receptor types, we found evidence that NSIs should be beneficial for con-  
384 centration invariant mixture processing: NSIs lead to more faithful representation of odor mixtures  
385 by PNs in the sense that the ratio of PN activity is closer to the ratio of input concentrations when  
386 NSIs are present. Similarly, the mutual information between the ratio of input concentrations and  
387 the ratio of PN activity is higher for the NSI model. While we admittedly do not know how exactly  
388 odor information is represented in PN activity, responses that differ systematically with input ratio  
389 must be superior to responses that saturate and hence do not inform about the input ratio, as  
390 seen in the control model.

391 Furthermore, using a model variant with no NSIs but LN inhibition between glomeruli in the  
392 AL we found that 1. For synchronous individual whiffs, both models, the one with NSI mechanism  
393 and the one with LN inhibition, are better than the control model in several conditions (*Figure 6*  
394 *g*); moreover, the NSI mechanism is typically more effective than LN inhibition. This is especially  
395 true for very short stimuli (<100ms). 2. For asynchronous individual whiffs, PN responses to the  
396 later whiff are strongly altered by the response to the first whiff when LN inhibition is present. In  
397 contrast, with NSIs the PN responses to the second whiffs are only mildly affected by the activity  
398 triggered by the first whiff, indicating that with NSIs there is less of a trade-off between benefits in  
399 encoding synchronous mixtures and distortions when odorants from separate sources mix.

400 These results further support the hypothesis that the NSI mechanism offers an evolutionary  
401 advantage by enabling more precise odor coding for these simple stimuli. Similar conclusions  
402 can be drawn when analyzing the capacity of the insect olfactory systems to encode the correla-  
403 tion between two odorants in a more realistic setting of an odor plume. We found that, when  
404 analysing peak PN activity (the integrated PN firing rate over windows during which it is above a  
405 given threshold), the model with NSI mechanism outperforms the LN inhibition model and both  
406 are better when considering peak activity than when considering average PN activity. Besides sup-  
407 porting the benefits of NSIs this also adds further evidence in favor of using peak activity to encode  
408 important features of a signal, in this case stimulus correlations, as hypothesized in earlier work  
409 (see e.g. *Krofczik et al. (2009); Wilson et al. (2017)*).

## 410 **The model and its limitations**

411 *“A good model should not copy reality, it should help to explain it”, Segev (1992).*

412 As in every modelling work the level of description must match the purpose of the investigation.  
413 In terms of Marr’s categorisation of models (*Marr and Poggio, 1976*), our model is somewhere  
414 between the algorithmic level - as both our models implement a form of lateral inhibition - and  
415 the implementation level - albeit we are not yet able to capture the underlying physics of the NSI  
416 mechanism. Because of our hypotheses that the role of NSIs is to improve processing of temporally  
417 complex stimuli, we focused on a description which included temporal dynamics but was otherwise  
418 as simple as possible. We therefore have simplified 1. the cellular dynamics of odor transduction  
419 (*Kaissling, 2001, 2009, 2014, 2019; Gu and Rospars, 2011; Gorur-Shandilya et al., 2017*) and only  
420 heuristically describe the macroscopic effects at the receptor neuron level, an approach similar  
421 to (*Lazar and Yeh, 2020*); 2. the complexity of the full receptor repertoire in the insect olfactory  
422 system, e.g. about 60 ORN types in *Drosophila*, and instead focused on a single sensillum with two  
423 co-housed ORNs; 3. the true complexity of the many different LN types and transmitters in the  
424 AL (*Silbering et al., 2008*), using only GABA<sub>A</sub>-like LNs. 4. the spatial distribution of the sensilla on  
425 the surface of the antenna or the maxillary palp; 5. the complexity of odor stimuli delivered by  
426 stimulation devices in the experiments we are mimicking for the single pulse investigation (see the

427 corresponding Model and methods section, (*Pannunzi and Nowotny, 2019*)), 6. the asymmetry of  
428 NSIs where there is some evidence that the strength of the NSIs is proportional to the size of the  
429 ORN that is exerting the interaction onto another neuron *Zhang et al. (2019)*. By making these  
430 simplifications we were able to reduce the number of free parameters in the model, reasonably  
431 constrain most parameters and scan the few remaining parameters, such as the strength of LN  
432 inhibition, across a reasonable range. This increases our confidence that the observed benefits of  
433 NSIs for olfactory information processing are not artefacts of particular parameter choices in the  
434 model(s).

435 For the sake of simplicity we chose to work with a specific animal model in mind and because  
436 of the large amount of information available in the literature, we chose *Drosophila*. It will be inter-  
437 esting to see whether and how much our results can be generalized to other insect such as bees,  
438 mosquitoes or moths.

### 439 **Comparison with related modelling works**

440 “If I have seen further it is by standing on the shoulders of Giants.” I. Newton (1675).

441 Our work builds on ideas in previous models (e.g., *Chan et al. (2018)*; *Rospars et al. (2008)*; *Ver-*  
442 *meulen and Rospars (2004)*) and concurrent approaches (e.g. *Lazar and Yeh (2020)*). While earlier  
443 modeling works focused on the oscillatory and patterned dynamics of activity in the antennal lobe  
444 (*Bazhenov et al., 2001a,b*; *Linster et al., 1993*; *Linster and Smith, 1997*; *Linster et al., 2005*), it was  
445 soon realized that the recognition of odorants and their mixtures across different concentrations  
446 posed a particularly difficult question. One school of models explored the idea of winnerless com-  
447 petition as a dynamical systems paradigm for concentration invariant coding (*Laurent et al., 2001*;  
448 *Kwok, 2007*) while others explored more direct gain control mechanism mediated by local neurons  
449 in the AL (*Getz and Lutz, 1999*; *Schmucker et al., 2011*; *Serrano et al., 2013*). The task becomes even  
450 more difficult when the exact ratio of mixtures needs to be recognised, and a network model for  
451 mixture ratio detection for very selective pheromone receptors has been formulated in (*Zavada*  
452 *et al., 2011*). However, generally, odors already interact at the level of individual ORs due to com-  
453 petitive and non-competitive mechanisms which can be recapitulated in models, see e.g. (*Rospars*  
454 *et al., 2008*) for vertebrates and (*Chan et al., 2018*) for invertebrates.

455 However, our model also makes a clear departure from the large number of models that have  
456 been built on assumptions and data based on long, essentially constant, odor step stimuli. While  
457 these kind of stimuli are not impossible, they can be considered as the exception more than the  
458 rule; for instance, even at more than 60m from the source, around 90% of whiffs last less than  
459 200 ms (*Justus et al., 2002*; *Yee et al., 1993*), see (*Pannunzi and Nowotny, 2019*) for review. This  
460 insight is particularly difficult to reconcile with models that emphasize and depend on intrinsically  
461 generated oscillations in the antennal lobe (*Bazhenov et al., 2001a,b*; *Linster et al., 2005, 1993*;  
462 *Linster and Smith, 1997*), and models that depend on comparatively slow, intrinsically generated  
463 dynamics such as the models based on the winnerless competition mechanism (*Rabinovich et al.,*  
464 *2001*; *Laurent et al., 2001*). The original interpretation of these models, how they use intrinsic  
465 neural dynamics to process essentially constant stimuli, is disrupted when stimuli have their own  
466 fast dynamics. How to reconcile the idea of intrinsic neural dynamics for information processing  
467 with natural odor stimuli that have very rich temporal dynamics of their own remains an open  
468 problem.

469 In building our model, we followed the main ideas developed by *Vermeulen and Rospars (2004)*  
470 but went beyond the assumption of constant stimuli and also added the important element of  
471 adaptation in ORNs and PNs, a widely accepted feature that is important in the context of dynamic  
472 stimuli; and while *Vermeulen and Rospars (2004)* already were interested in possible evolutionary  
473 advantages of NSIs, we here added the comparison with lateral inhibition in the AL that has been  
474 described as a competing mechanism, from an experimental (e.g. *Todd and Baker (1999)*) and  
475 a theoretical point of view (e.g., *Getz and Lutz (1999)*; *Zavada et al. (2011)*; *Serrano et al. (2013)*).  
476 Finally an important addition in this study are the mixture stimuli: Many, though not all, earlier



477 works focused on the response of the network to mono-molecular odors, whereas we analyse the  
478 network response to two-odorant mixtures.

479 A previous study with very similar motivation relating to mixture ratio recognition is the analysis  
480 of pheromone ratio recognition of *Zavada et al. (2011)*. However, this earlier work still assumed  
481 constant stimuli, no adaptation in ORNs, a fixed target input ratio and only LN inhibition.

#### 482 **Further hypotheses about NSIs**

483 *“there is always a well-known solution to every human problem—neat, plausible, and wrong.”* H. L.  
484 Mencken 1920 “Prejudices: Second Series”

485 At this early stage, our knowledge and understanding of NSIs is still full of gaps. For example,  
486 while suggestive our results cannot prove beyond doubt whether NSIs are effectively useful to the  
487 olfactory system, or if they are an evolutionary spandrel. We also do not know their evolutionary  
488 history. One interesting idea would be that the complex function of improved odor mixture encod-  
489 ing could have arisen as a side effect from a simpler function, e.g. of saving space, but we do not  
490 have any evidence to support this.

491 Researchers in the past 20 years have suggested a number of non exclusive explanations for  
492 the functions of NSIs. We have analyzed two of them - improved odor ratio representation and  
493 detecting plume correlations. Other typical hypotheses are: 1. NSIs may be useful to generally  
494 enhance the dynamic range of ORN responses. Based on an electrical circuit model *Vermeulen and*  
495 *Rospars (2004)* showed an increased dynamic range of responses in the more strongly activated  
496 ORN in a sensillum. While the model does not include established experimental insights, e.g. ORN  
497 adaptation *Kim et al. (2011)*; *Martelli et al. (2013)*, its main assumptions remain plausible. 2. NSIs  
498 could facilitate novelty detection for odor signals on the background of other odors *Todd and Baker*  
499 *(1999)*, if newly arriving “foreground odors” suppress the ongoing response to an already present  
500 “background odor”.

501 The improvement of dynamic range by NSIs sits alongside work that showed that syntopic in-  
502 teractions at the receptor level and masking interactions at a cellular level achieve similar effects  
503 *Reddy et al. (2018)*; *Singh et al. (2019)* as well as improving mixture representations. Similarly,  
504 *Chan et al. (2018)* showed that syntopic interactions improve concentration invariant mixture rep-  
505 resentation in particular for odors with many components. How these receptor-level and cell-level  
506 mechanisms interact with sensillum-level NSIs is an interesting future research question.

507 With regards to separating foreground odors from background odors, *Todd and Baker (1999)*  
508 noticed early on that NSIs duplicate the role of LNs in the AL even though *(Wilson, 2013)* pointed  
509 out later that LN networks take effect later and mainly decorrelate PN activities and normalize  
510 them with respect to the *average input* from ORNs. Here we have added to the discussion by show-  
511 ing that NSIs have advantages with respect to their faster timescale that led to less disruption of  
512 asynchronous odor whiffs.

513 Moreover, NSIs have two additional key advantages with respect to LN inhibition in the AL or  
514 processes in later brain areas: 1. NSIs take effect without the need to generate spikes and reduce  
515 the number of necessary spikes which makes them energetically advantageous *(Hasenstaub et al.,*  
516 *2010; Laughlin, 2001, 1998; Lennie, 2003; Sarpeshkar, 1998)*. 2. NSIs take place at the level of the  
517 single sensillum and hence a few spikes and synapses earlier than any AL or later interactions  
518 *(Todd and Baker, 1999; Wilson, 2013)*. In the AL the information from ORNs of the same type is  
519 likely pooled and information about the activity of individual ORNs is not retained (see e.g. *Kazama*  
520 *and Wilson (2009)*; *Nagel and Wilson (2011)*). Therefore, while interactions within the sensillum are  
521 precise in space and time, interactions in the AL will be global (averaged over input from many  
522 sensilla) and information channels will interact in an averaged fashion. Similar local interactions in  
523 the very early stages of sensory perception were already discussed for the retina *(Klaassen et al.,*  
524 *2016; Thoreson and Mangel, 2012)*.

## 525 Conclusions

526 In conclusion, we have demonstrated in a model of the early olfactory system that NSIs have advantages over LN inhibition in the AL with respect to faithful mixture ratio recognition and plume separation. In our future work we seek to confirm the behavioral relevance of NSIs in *Drosophila*.  
527  
528 Other interesting future directions include the relationship of NSIs and syntopic effects/masking,  
529 as well as the differential roles of NSIs and LN inhibition when both are present at the same time.  
530

## 531 Model and methods

### 532 Model topology

533 We model the electrical activity of the early olfactory system of *Drosophila melanogaster*. The model  
534 encompasses ORNs on the antenna, and the matching glomeruli in the AL, containing PNs and LNs.  
535 For simplicity, ORNs are housed in sensilla in pairs, and each neuron in a pair expresses a different  
536 OR type. The paired neurons interact through NSIs, effectively leading to mutual inhibition (see  
537 *Figure 1 a*). There are multiple sensilla of the same type on each antenna. We here model 40  
538 sensilla per type (*Kazama and Wilson, 2009*). ORNs of the same type all project exclusively to the  
539 same glomerulus in the AL, making excitatory synapses onto the associated PNs. In addition to the  
540 inputs from ORNs, PNs also receive global excitation from PNs associated with other glomeruli and  
541 from other parts of the brain. They are inhibited by the LNs of other glomeruli but not by LN in the  
542 same glomerulus (see *Figure 2*). The model simulates one type of sensillum and hence two types  
543 of ORNs,  $ORN_a$  and  $ORN_b$ . We assume that  $ORN_a$  and  $ORN_b$  are selectively activated by odors A  
544 and B, respectively (see *Figure 2* and *Figure 1 a*).

### 545 Olfactory Receptor Neurons

546 We describe ORN activity in terms of an odorant transduction process combined with a biophysical  
547 spike generator (*Lazar and Yeh, 2020*). During transduction, odorants bind and unbind at olfactory  
548 receptors according to simple rate equations. As we are not interested in the competition of different  
549 odorants for the same receptors, we simplify the customary two-stages binding and activation  
550 model (*Rospars et al., 2008; Nowotny et al., 2013; Chan et al., 2018*) to a single binding rate equation  
551 for the fraction  $r$  of receptors bound to an odorant,

$$\dot{r} = b_r C^n (1 - r) - d_r r \quad (2)$$

$$\begin{aligned} \dot{x} &= a_x r - c_x y (1 + d_x x) - b_x x \\ \dot{y} &= a_y x - b_y y \end{aligned} \quad (3)$$

552 where  $x$  is the 'activation' of the ORN and  $y$  an internal adaptation variable. The firing  $v$  of the  
553 ORN is then obtained by a sigmoid filter applied to  $x$ ,

$$v = \frac{v_{max}}{1 + \exp(-a_{rect}(x - c_{rect}))} \quad (4)$$

554 The parameters ( $a_x, b_x, a_r, c_x, d_y, b_y$ ) are rate constants that are estimated together with  $b_r$  and  
555  $d_r$  to reproduce the data presented in *Lazar and Yeh (2020); Martelli et al. (2013)*. The maximum  
556 spike rate  $v_{max}$  and sigmoid shape parameters  $a_{rect}$  and  $c_{rect}$  are given in 1. The model is similar in  
557 nature to the models presented in (*De Palo et al., 2013; Lazar and Yeh, 2020*) albeit simplified and  
558 formulated in more tangible rate equations. As we will demonstrate below, this simplified model  
559 can reproduce experimental data equally well as the previous models. In order to simulate the  
560 spiking output of a population of ORNs of a given type, we simulate the odor binding dynamics  
561 once to obtain the firing rate  $v$  and then sample from  $N_{ORN} = 40$  Poisson processes with rate  $v$ . Using  
562 Poisson processes is very common for the sake of simplicity, and it is also close to experimental  
563 observations (see e.g. *Kaisling (2014)*). However, ORN firing of homotypic ipsi-lateral ORNs has  
564 been observed to have specific correlations (*Kazama and Wilson, 2009*) that are not automatically

565 reproduced by independent Poisson spike trains. To replicate the experimentally observed corre-  
 566 lations - correlation for homotypic ipsi-lateral without stimulation around 0.14 and for homotypic  
 567 ipsi-lateral under stimulation is around 0.2 - we extracted the random numbers for the generation  
 568 of the Poissonian spike trains of the ORNs from a multivariate normal distribution with a covari-  
 569 ance matrix of this shape: 1 in the diagonal,  $c_{hom}$  for the elements connecting homotypic neurons  
 570 (see 1) and 0 all the others.

### 571 Non-synaptic interactions

572 To simulate experimentally observed NSIs, we assume a simple linear model with respect to the  
 573 output variable of the transduction model, as the exact biochemical mechanism for NSIs is of yet  
 574 unclear. We do this with a multiplicative term ( $x_a x_b$ ) to reflect that presumably the driving force  
 575 for  $x_a$  ( $x_b$ ) is removed, rather than ORN<sub>a</sub> (ORN<sub>b</sub>) being directly hyperpolarized.

$$\begin{aligned}\dot{x}_a &= a_x r_a - c_x y_a (1 + d_x x_a) - b_x x_a - \omega_{NSI} x_a x_b \\ \dot{x}_b &= a_x r_b - c_x y_b (1 + d_x x_b) - b_x x_b - \omega_{NSI} x_a x_b\end{aligned}\quad (5)$$

576 The full set of parameters used for the simulations are reported in Table 1.

### 577 The antennal lobe

578 We here reduce the antennal lobe (AL) to two glomeruli, a and b (see Fig. Topology) in order to  
 579 focus on the effects of NSIs of the corresponding ORN types. The numbers of PNs and LNs per  
 580 glomerulus are as reported in literature (*De Bruyne et al., 2001; Kazama and Wilson, 2009; Stocker,*  
 581 *1994; Vosshall et al., 1999*).

582 The competing LNs are inhibitory whereas the PN is excitatory. For simplicity, we do not model  
 583 multiple kinds of LNs or PNs that have been observed in the AL. Similar models are being used  
 584 extensively in the analysis of the insect AL (*Chan et al., 2018; Schmuker et al., 2011; Serrano et al.,*  
 585 *2013; Zavada et al., 2011*) and are well suited for replicating the competition dynamics that we seek  
 586 to evaluate.

587 Each ORN spike (width  $sp_{length}$  and height  $sp_{height}$ ) from the  $N_{ORNs}$  is summed into a variable,  
 588  $u_{ORN}$ . PN and LN spikes have the same width  $sp_{length}$  and height  $sp_{height}$  and per each (impinging)  
 589 neuron, PN or LN, they are summed into the variables  $u_{PN}$  and  $u_{LN}$ , respectively.  $u_{ORN}$  together  
 590 with  $u_{LN}$  drives the activity of the corresponding PN:

$$\begin{aligned}\tau_V \dot{V} &= (V_{rest}^{PN} - V) + s (V_{rev}^{PN} - V) \\ \tau_s \dot{s} &= \alpha_{ORN} u_{ORN} (1 - s) (1 - x) (1 - y) - s \\ \tau_x \dot{x} &= \alpha_x u_{ORN} (1 - x) - x \\ \tau_y \dot{y} &= \alpha_{LN} u_{LN} (1 - y) - y\end{aligned}\quad (6)$$

591 where  $V$  is the PN membrane potential,  $s$  represents the combined action of synaptic inputs,  $x$   
 592 is an adaptation variable, and  $y$  is the inhibitory variable impinging into PNs. Each one of these  
 593 variables has its time constant -  $\tau_s$ ,  $\tau_V$ ,  $\tau_x$ , and  $\tau_y$ . The multiplicative factors  $\alpha_{LN}$ ,  $\alpha_{ORN}$  reflects the  
 594 amount of released vesicles per each spike from an ORN and LN, respectively and they can be  
 595 considered synaptic strength. In the second equation, the term  $(1-y)$  reflects the inhibition from  
 596 LNs, implementing a pre-synaptic type of inhibition proportional to the low-pass filtered activity of  
 597 the LNs. When  $V > \Theta$ , the PN fires a spike and  $V$  is reset to  $V_{rest}$ .

598 LNs receive excitatory input from PNs and are otherwise described by a similar model but with-  
 599 out adaptation,

$$\begin{aligned}\tau_V \dot{V} &= (V_{rest}^{LN} - V) + s (V_{rev}^{LN} - V) \\ \tau_s \dot{s} &= \alpha_{PN} u_{PN} (1 - s) - \beta_{LN} s\end{aligned}\quad (7)$$

600 where  $V$  is the LN membrane potential,  $s$  represents the synaptic input, and  $\alpha_{PN}$  reflects the rate  
 601 of transmitter release, or synaptic strength, for incoming synapses from a PN. When  $V > \Theta$ , the LN  
 602 fires a spike and  $V$  is reset to  $V_{rest}$ . The refractory period,  $\tau_{ref}$ , for PNs and LNs lasts 2 ms. All the  
 603 parameters used for the simulations are reported in 1. The comparative analysis between the LN

604 inhibition and NSI mechanism has been carried out through the exploration of the two parameters  
 605  $\alpha_{LN}$  and the strength of the NSIs,  $\omega_{NSI}$ .

### 606 Odor stimuli

607 To compare the model response with the neurophysiological results in the literature and with pre-  
 608 vious models (*Lazar and Yeh, 2020*), we analyzed its activity with different stimuli: step stimuli,  $u_{step}$ ,  
 609 ramp stimuli  $u_{ramp}$  and parabolic stimuli  $u_{par}$ .

$$u_{step}(t) = \begin{cases} c, & t_1 \leq t \leq t_2 \\ 0, & \text{otherwise} \end{cases} \quad (8)$$

$$u_{par}(t) = \begin{cases} c\left(\frac{t-t_1}{t_2-t_1-\delta}\right)^2, & t_1 \leq t \leq t_2 - \delta \\ c\left(1 - \frac{t-t_2+\delta}{\delta}\right)^2, & t_2 - \delta \leq t \leq t_2 \\ 0, & \text{otherwise.} \end{cases} \quad (9)$$

$$u_{ramp}(t) = \begin{cases} c\frac{t-t_1}{t_2-t_1-2\delta}, & t_1 \leq t \leq t_2 - 2\delta \\ c\left(1 - \frac{t-t_2+2\delta}{2\delta}\right), & t_2 - 2\delta \leq t \leq t_2 \\ 0, & \text{otherwise} \end{cases} \quad (10)$$

610 where  $t_1 = 0.5s$ ,  $t_2 = 2.5s$ , and  $\delta = 0.1s$  (see *Figure 3–Figure Supplement 1*).

**Table 1.** Model parameters. To fit the experimental data, we used the following 38 parameters: Transduction (3), ORNs (10), ORNs, PNs and LNs (18), and Network (7) parameters. We fitted ORN, PN and LN parameters in order to reproduce the time course shown in e-phys experiments (e.g. *Kim et al. (2011)*; *Martelli et al. (2013)*); we fit the correlation parameters to obtain similar correlated values as those reported in (*Kazama and Wilson, 2009*); Network parameters are not fitted, but extracted from the literature (e.g. (*Kazama and Wilson, 2009*; *Stocker, 1994*; *Vosshall et al., 1999*)). NSI strength and synaptic strength of LNs are not fitted, but their values were changed to explore the network behavior.

| Transduction           |        | Network         |              | LNs             |         |
|------------------------|--------|-----------------|--------------|-----------------|---------|
| $n$                    | 1      | $N_{orn,pn}$    | 18           | $V_{rest}^{LN}$ | -3 mV   |
| $b_r$                  | 0.01   | $N_{orn,glo}$   | 40           | $V_{rev}^{LN}$  | 15 mV   |
| $d_r$                  | 0.009  | $N_{pn,glo}$    | 5            | $\alpha_{LN}$   | 10      |
| ORNs                   |        | $N_{ln,glo}$    | 3            | $\tau_y$        | 600 ms  |
| $a_y$                  | 0.25   | $N_{glo}$       | 2            | $\alpha_{PN}$   | 2.5     |
| $b_y$                  | 0.002  | $c_{hom}$       | 0.4          | $y_{LN0}$       | 0.025   |
| $c_x$                  | 0.0028 | $v_{pn,noise}$  | 250 Hz       | PNs             |         |
| $b_x$                  | 0.2    | LN, ORN, and PN |              | $\alpha_{ORN}$  | 2.5     |
| $d_x$                  | 1      | $\tau_s$        | 10 ms        | $V_{rest}^{PN}$ | -6.5 mV |
| $a_x$                  | 1      | $\tau_V$        | 0.5 ms       | $V_{rev}^{PN}$  | 15 mV   |
| $\omega_{NSI}$         | 0.2    | $sp_{length}$   | 4 ms         | $\alpha_x$      | 2       |
| Rectification function |        | $\Theta$        | 1            | $\tau_x$        | 600 ms  |
| $c_{rect}$             | 1      | $sp_{height}$   | 0.3 $\Theta$ | $x_{PN0}$       | 0.48    |
| $a_{rect}$             | 3.3    | $\tau_{ref}$    | 2 ms         |                 |         |
| $v_{max}$              | 250 Hz |                 |              |                 |         |

## 611 **Simulation of realistic plumes**

612 In a realistic scenario, odorants are mixed together in complex plumes that follow the laws of  
613 fluid dynamics. For these conditions, even odorants coming from different sources are sometimes  
614 mixed together, and one difficult task for insects is to recognize when two intermingled odorants  
615 are coming from the same source or from separate sources. Of course it is not possible to distin-  
616 guish these two possibilities from a single, instantaneous sampling, but on average the odorants  
617 coming from the same source are more correlated than odorants coming from separate sources  
618 (see panel a of *Figure 7–Figure Supplement 1*). To test the function of NSIs for odor source separa-  
619 tion, we adopted long stimuli (>3 s), with statistical properties that resemble the filaments observed  
620 downwind from an odor source in an open environment (*Mylné and Mason, 1991; Pannunzi and*  
621 *Nowotny, 2019; Yee et al., 1993, 1995*) at zero crosswind distance. For these conditions, the distri-  
622 butions of whiff and clean air durations follow a power law with exponent -3/2 (see, e.g., *Yee et al.*  
623 *(1993)*), and the cumulative distribution function (CDF) for the normalized concentration values will  
624 follow an exponential distribution and we fitted the CDF as a piecewise linear function, as follows

$$CDF(x) = \begin{cases} 5/3x, & 0 \leq x \leq 0.3 \\ (1 - 10^{-(a_1 + b_1 x)}), & \text{otherwise} \end{cases} \quad (11)$$

625 where  $x$  is the normalized concentration  $C/\bar{C}$ , and  $a_1$  and  $b_1$  are free parameters, which values  
626 were determined by fitting and are reported below in 1 (*Mylné and Mason, 1991*). We analysed  
627 stimuli with different ‘intermittency factor’, defined here as the proportion of time where odor  
628 concentration is non-zero (even though there are different definitions in use). To simulate the  
629 arrival of plumes of two odors with the aforementioned properties, we need to generate a time  
630 series of whiffs and blanks with the correct statistics for each odorant (like in (*Jacob et al., 2017*))  
631 and the correct correlation between odorants. We achieved this by the following procedure:

- 632 1. We drew two correlated pseudo random numbers from a Gaussian distribution, with a given  
633 correlation
- 634 2. We mapped the two numbers into two uniform random variables
- 635 3. The uniform random variables are mapped into the desired power law distributions; blank  
636 and whiff durations have different distributions depending on the distance from the source  
637 (see *Figure 6–Figure Supplement 2*).

## 638 **Analysis and simulation**

639 We used the PNs spiking activity as the output of the networks and we analysed it to estimate  
640 the ability of the three networks to encode odorants mixture ratio and spatio-temporal analysis.  
641 We assumed for simplicity that the relevant information is present in the firing rate and therefore  
642 analyse the average activity and peak activity, defined below and in the main text.

643 For the analysis of the ratio encoding (see *Figure 6*), The concentration ratio is ratio between  
644 the weak and the strong concentration values,  $R_c = c_w/c_s$ ; while the PN ratio is  $R_v = v_w/v_s$ .

645 We defined the coding error as the square relative distance between the ratio of the PN activity  
646 and the ratio of the odorant concentrations. The relative distance is therefore:  $((R_c - R_v)/(R_c + R_v))^2$ .

647 **Spike density function** Firing rates were obtained from the convolution of the spike trains with  
648 the kernel:  $k(\hat{t}) = \hat{t} \exp(-\hat{t}/\tau)$ . Where  $\hat{t} = t - t_{spike} + \tau$ , so that the maximum of  $k$  is situated at the  
649 occurrence of the spike,  $t_{spike}$ . The timescale of the kernel was chosen as  $\tau=20$  ms (*Nawrot et al.,*  
650 *1999*).

651 The model was simulated with custom Python code, as well as the analysis of the simulations.  
652 All code is publicly available on github, <https://github.com/mariopan/flynose>.

## 653 **Acknowledgments**

654 The research in this paper has received funding from the Human Frontiers Science Program, Grant  
655 RGP0053/2015 (odor objects project), the European Union’s Horizon 2020 research and innova-

656 tion program under Grant Agreement No. 785907 (HBP SGA2) and a Leverhulme Trust Research  
657 Project.

## 658 References

- 659 **Andersson MN**, Larsson MC, Blaženec M, Jakuš R, Zhang QH, Schlyter F. Peripheral modulation of pheromone  
660 response by inhibitory host compound in a beetle. *Journal of Experimental Biology*. 2010; 213(19):3332–  
661 3339.
- 662 **Av-Ron E**, Rospars JP. Modeling insect olfactory neuron signaling by a network utilizing disinhibition. *Biosys-*  
663 *tems*. 1995; 36(2):101–108.
- 664 **Av-Ron E**, Vibert JF. A model for temporal and intensity coding in insect olfaction by a network of inhibitory  
665 neurons. *Biosystems*. 1996; 39(3):241–250.
- 666 **Baker TC**, Fadamiro H, Cosse A. Moth uses fine tuning for odour resolution. *Nature*. 1998; 393(6685):530–530.
- 667 **Bazhenov M**, Stopfer M, Rabinovich M, Abarbanel HD, Sejnowski TJ, Laurent G. Model of cellular and network  
668 mechanisms for odor-evoked temporal patterning in the locust antennal lobe. *Neuron*. 2001; 30(2):569–581.
- 669 **Bazhenov M**, Stopfer M, Rabinovich M, Huerta R, Abarbanel HD, Sejnowski TJ, Laurent G. Model of transient  
670 oscillatory synchronization in the locust antennal lobe. *Neuron*. 2001; 30(2):553–567.
- 671 **Binyameen M**, Jankuvová J, Blaženec M, Jakuš R, Song L, Schlyter F, Andersson MN. Co-localization of insect  
672 olfactory sensory cells improves the discrimination of closely separated odour sources. *Functional ecology*.  
673 2014; 28(5):1216–1223.
- 674 **Bruce TJ**, Wadhams LJ, Woodcock CM. Insect host location: a volatile situation. *Trends in plant science*. 2005;  
675 10(6):269–274.
- 676 **Chan HK**, Hersperger F, Marachlian E, Smith BH, Locatelli F, Szyszka P, Nowotny T. Odorant mixtures elicit less  
677 variable and faster responses than pure odorants. *PLoS computational biology*. 2018; 14(12):e1006536.
- 678 **Christensen TA**, Mustaparta H, Hilderbrand JG. Discrimination of sex pheromone blends in the olfactory sys-  
679 tem of the moth. *Chemical Senses*. 1989; 14(3):463–477.
- 680 **Couto A**, Alenius M, Dickson BJ. Molecular, anatomical, and functional organization of the *Drosophila* olfactory  
681 system. *Current Biology*. 2005; 15(17):1535–1547.
- 682 **De Bruyne M**, Foster K, Carlson JR. Odor coding in the *Drosophila* antenna. *Neuron*. 2001; 30(2):537–552.
- 683 **De Palo G**, Facchetti G, Mazzolini M, Menini A, Torre V, Altafini C. Common dynamical features of sensory  
684 adaptation in photoreceptors and olfactory sensory neurons. *Scientific reports*. 2013; 3:1251.
- 685 **Erskine A**. Perception and representation of temporally patterned odour stimuli in the mammalian olfactory  
686 bulb. PhD thesis, University College London; 2018.
- 687 **Fadamiro HY**, Baker TC. *Helicoverpa zea* males (Lepidoptera: Noctuidae) respond to the intermittent fine  
688 structure of their sex pheromone plume and an antagonist in a flight tunnel. *Physiological Entomology*.  
689 1997; 22(4):316–324.
- 690 **Getz WM**, Lutz A. A neural network model of general olfactory coding in the insect antennal lobe. *Chemical*  
691 *senses*. 1999; 24(4):351–372.
- 692 **Gorur-Shandilya S**, Demir M, Long J, Clark DA, Emonet T. Olfactory receptor neurons use gain control and  
693 complementary kinetics to encode intermittent odorant stimuli. *Elife*. 2017; 6:e27670.
- 694 **Gu Y**, Rospars JP. Dynamical modeling of the moth pheromone-sensitive olfactory receptor neuron within its  
695 sensillar environment. *PLoS One*. 2011; 6(3).
- 696 **Hasenstaub A**, Otte S, Callaway E, Sejnowski TJ. Metabolic cost as a unifying principle governing neuronal  
697 biophysics. *Proceedings of the National Academy of Sciences*. 2010; 107(27):12329–12334.
- 698 **Huerta R**, Nowotny T, García-Sánchez M, Abarbanel HD, Rabinovich MI. Learning classification in the olfactory  
699 system of insects. *Neural computation*. 2004; 16(8):1601–1640.
- 700 **Jacob V**, Monsempès C, Rospars JP, Masson JB, Lucas P. Olfactory coding in the turbulent realm. *PLOS Compu-*  
701 *tational Biology*. 2017; 13(12):e1005870.

- 702 **Jortner RA**, Farivar SS, Laurent G. A Simple Connectivity Scheme for Sparse Coding in an Olfactory Sys-  
703 tem. *Journal of Neuroscience*. 2007; 27(7):1659–1669. <https://www.jneurosci.org/content/27/7/1659>, doi:  
704 [10.1523/JNEUROSCI.4171-06.2007](https://doi.org/10.1523/JNEUROSCI.4171-06.2007).
- 705 **Justus KA**, Murlis J, Jones C, Cardé RT. Measurement of odor-plume structure in a wind tunnel using a pho-  
706 toionization detector and a tracer gas. *Environmental Fluid Mechanics*. 2002; 2(1-2):115–142.
- 707 **Kaissling KE**. Olfactory perireceptor and receptor events in moths: a kinetic model. *Chemical Senses*. 2001;  
708 26(2):125–150.
- 709 **Kaissling KE**. Olfactory perireceptor and receptor events in moths: a kinetic model revised. *Journal of Com-*  
710 *parative Physiology A*. 2009; 195(10):895–922.
- 711 **Kaissling KE**. Pheromone reception in insects. The example of silk moths in *Neurobiology of Chemical Com-*  
712 *munication*. 2014; p. 99–146.
- 713 **Kaissling KE**. Responses of insect olfactory neurons to single pheromone molecules. In: *Olfactory Concepts of*  
714 *Insect Control-Alternative to Insecticides* Springer; 2019.p. 1–27.
- 715 **Kazama H**, Wilson RI. Origins of correlated activity in an olfactory circuit. *Nature neuroscience*. 2009;  
716 12(9):1136.
- 717 **Kim AJ**, Lazar AA, Slutskiy YB. System identification of *Drosophila* olfactory sensory neurons. *Journal of com-*  
718 *putational neuroscience*. 2011; 30(1):143–161.
- 719 **Kim AJ**, Lazar AA, Slutskiy YB. Projection neurons in *Drosophila* antennal lobes signal the acceleration of odor  
720 concentrations. *Elife*. 2015; 4:e06651.
- 721 **Klaassen LJ**, de Graaff W, Van Asselt JB, Klooster J, Kamermans M. Specific connectivity between photoreceptors  
722 and horizontal cells in the zebrafish retina. *Journal of neurophysiology*. 2016; 116(6):2799–2814.
- 723 **Krofczik S**, Menzel R, Nawrot MP. Rapid odor processing in the honeybee antennal lobe network. *Frontiers in*  
724 *computational neuroscience*. 2009; 2:9.
- 725 **Kwok YC**. Encoding of odour blends in the moth antennal lobe. PhD thesis, University of Leicester; 2007.
- 726 **Laughlin S**. de Ruyter van Steveninck RR, Anderson JC. 1998. The metabolic cost of neural information *Nat*  
727 *Neurosci*. 1998; 1(36):10–1038.
- 728 **Laughlin SB**. Energy as a constraint on the coding and processing of sensory information. *Current opinion in*  
729 *neurobiology*. 2001; 11(4):475–480.
- 730 **Laurent G**, Stopfer M, Friedrich RW, Rabinovich MI, Volkovskii A, Abarbanel HD. Odor encoding as an active,  
731 dynamical process: experiments, computation, and theory. *Annual review of neuroscience*. 2001; 24(1):263–  
732 297.
- 733 **Lazar AA**, Yeh CH. A molecular odorant transduction model and the complexity of spatio-temporal encoding  
734 in the *Drosophila* antenna. *PLOS Computational Biology*. 2020; 16(4):e1007751.
- 735 **Leal WS**. Odorant reception in insects: roles of receptors, binding proteins, and degrading enzymes. *Annual*  
736 *review of entomology*. 2013; 58:373–391.
- 737 **Lennie P**. The cost of cortical computation. *Current biology*. 2003; 13(6):493–497.
- 738 **Lin AC**, Bygrave AM, de Calignon A, Lee T, Miesenböck G. Sparse, decorrelated odor coding in the mushroom  
739 body enhances learned odor discrimination. *Nature Neuroscience*. 2014; 17(4):559–568. [https://doi.org/10.](https://doi.org/10.1038/nn.3660)  
740 [1038/nn.3660](https://doi.org/10.1038/nn.3660), doi: [10.1038/nn.3660](https://doi.org/10.1038/nn.3660).
- 741 **Lin HH**, Lai JSY, Chin AL, Chen YC, Chiang AS. A Map of Olfactory Representation in the *Drosophila* Mushroom  
742 Body. *Cell*. 2007; 128(6):1205 – 1217. <http://www.sciencedirect.com/science/article/pii/S0092867407003170>,  
743 doi: <https://doi.org/10.1016/j.cell.2007.03.006>.
- 744 **Linster C**, Masson C, Kerszberg M, Personnaz L, Dreyfus G. Formal model of the insect olfactory macroglomeru-  
745 lus. In: *Computation and Neural Systems* Springer; 1993.p. 255–259.
- 746 **Linster C**, Sachse S, Galizia CG. Computational modeling suggests that response properties rather than spatial  
747 position determine connectivity between olfactory glomeruli. *Journal of neurophysiology*. 2005; 93(6):3410–  
748 3417.

- 749 **Linster C**, Smith BH. A computational model of the response of honey bee antennal lobe circuitry to odor mix-  
750 tures: overshadowing, blocking and unblocking can arise from lateral inhibition. *Behavioural brain research*.  
751 1997; 87(1):1–14.
- 752 **Marr D**, Poggio T. From understanding computation to understanding neural circuitry. . 1976; .
- 753 **Martelli C**, Carlson JR, Emonet T. Intensity invariant dynamics and odor-specific latencies in olfactory receptor  
754 neuron response. *Journal of Neuroscience*. 2013; 33(15):6285–6297.
- 755 **Mylne KR**, Mason P. Concentration fluctuation measurements in a dispersing plume at a range of up to 1000  
756 m. *Quarterly Journal of the Royal Meteorological Society*. 1991; 117(497):177–206.
- 757 **Nagel KI**, Wilson RI. Biophysical mechanisms underlying olfactory receptor neuron dynamics. *Nature neuro-*  
758 *science*. 2011; 14(2):208.
- 759 **Najar-Rodriguez AJ**, Galizia C, Stierle J, Dorn S. Behavioral and neurophysiological responses of an insect to  
760 changing ratios of constituents in host plant-derived volatile mixtures. *Journal of Experimental Biology*. 2010;  
761 213(19):3388–3397.
- 762 **Natale D**, Mattiacci L, Hern A, Pasqualini E, Dorn S. Response of female *Cydia molesta* (Lepidoptera: Tortricidae)  
763 to plant derived volatiles. *Bulletin of entomological research*. 2003; 93(4):335–342.
- 764 **van Naters WvdG**, Carlson JR. Receptors and neurons for fly odors in *Drosophila*. *Current biology*. 2007;  
765 17(7):606–612.
- 766 **Nawrot M**, Aertsen A, Rotter S. Single-trial estimation of neuronal firing rates: from single-neuron spike trains  
767 to population activity. *Journal of neuroscience methods*. 1999; 94(1):81–92.
- 768 **Nowotny T**, Huerta R, Abarbanel HD, Rabinovich MI. Self-organization in the olfactory system: one shot odor  
769 recognition in insects. *Biological cybernetics*. 2005; 93(6):436–446.
- 770 **Nowotny T**, Stierle JS, Galizia CG, Szyszka P. Data-driven honeybee antennal lobe model suggests how stimulus-  
771 onset asynchrony can aid odour segregation. *Brain research*. 2013; 1536:119–134.
- 772 **Olsen SR**, Bhandawat V, Wilson RI. Divisive normalization in olfactory population codes. *Neuron*. 2010;  
773 66(2):287–299.
- 774 **Pannunzi M**, Nowotny T. Odor stimuli: Not just chemical identity. *Frontiers in Physiology*. 2019; 10.
- 775 **Rabinovich M**, Volkovskii A, Lecanda P, Huerta R, Abarbanel H, Laurent G. Dynamical encoding by networks of  
776 competing neuron groups: winnerless competition. *Physical review letters*. 2001; 87(6):068102.
- 777 **Reddy G**, Zak JD, Vergassola M, Murthy VN. Antagonism in olfactory receptor neurons and its implications for  
778 the perception of odor mixtures. *Elife*. 2018; 7:e34958.
- 779 **Rospars JP**, Lansky P, Chaput M, Duchamp-Viret P. Competitive and noncompetitive odorant interactions in  
780 the early neural coding of odorant mixtures. *Journal of Neuroscience*. 2008; 28(10):2659–2666.
- 781 **Sarpeshkar R**. Analog versus digital: extrapolating from electronics to neurobiology. *Neural computation*.  
782 1998; 10(7):1601–1638.
- 783 **Schmuker M**, Yamagata N, Nawrot M, Menzel R. Parallel representation of stimulus identity and intensity in a  
784 dual pathway model inspired by the olfactory system of the honeybee. *Frontiers in neuroengineering*. 2011;  
785 4:17.
- 786 **Segev I**. Single neurone models: oversimple, complex and reduced. *Trends in neurosciences*. 1992; 15(11):414–  
787 421.
- 788 **Serrano E**, Nowotny T, Levi R, Smith BH, Huerta R. Gain control network conditions in early sensory coding.  
789 *PLoS computational biology*. 2013; 9(7).
- 790 **Shimizu K**, Stopfer M. Olfaction: intimate neuronal whispers. *Nature*. 2012; 492(7427):44–45.
- 791 **Silbering AF**, Okada R, Ito K, Galizia CG. Olfactory information processing in the *Drosophila* antennal lobe:  
792 anything goes? *Journal of Neuroscience*. 2008; 28(49):13075–13087.



- 793 **Singh V**, Murphy NR, Balasubramanian V, Mainland JD. Competitive binding predicts nonlinear responses  
794 of olfactory receptors to complex mixtures. *Proceedings of the National Academy of Sciences*. 2019;  
795 116(19):9598–9603.
- 796 **Stocker RF**. The organization of the chemosensory system in *Drosophila melanogaster*: a review. *Cell and*  
797 *tissue research*. 1994; 275(1):3–26.
- 798 **Su CY**, Menuz K, Reisert J, Carlson JR. Non-synaptic inhibition between grouped neurons in an olfactory circuit.  
799 *Nature*. 2012; 492(7427):66–71.
- 800 **Szyszkta P**, Stierle JS, Biergans S, Galizia CG. The speed of smell: odor-object segregation within milliseconds.  
801 *PloS one*. 2012; 7(4).
- 802 **Thoreson WB**, Mangel SC. Lateral interactions in the outer retina. *Progress in retinal and eye research*. 2012;  
803 31(5):407–441.
- 804 **Todd JL**, Baker TC. Function of peripheral olfactory organs. In: *Insect olfaction* Springer; 1999.p. 67–96.
- 805 **Vermeulen A**, Rospars JP. Why are insect olfactory receptor neurons grouped into sensilla? The teachings of a  
806 model investigating the effects of the electrical interaction between neurons on the transepithelial potential  
807 and the neuronal transmembrane potential. *European Biophysics Journal*. 2004; 33(7):633–643.
- 808 **Visser J**, Avé D. General green leaf volatiles in the olfactory orientation of the Colorado beetle, *Leptinotarsa*  
809 *decemlineata*. *Entomologia experimentalis et applicata*. 1978; 24(3):738–749.
- 810 **Vosshall LB**, Amrein H, Morozov PS, Rzhetsky A, Axel R. A spatial map of olfactory receptor expression in the  
811 *Drosophila* antenna. *Cell*. 1999; 96(5):725–736.
- 812 **Wilson CD**, Serrano GO, Koulakov AA, Rinberg D. A primacy code for odor identity. *Nature communications*.  
813 2017; 8(1):1–10.
- 814 **Wilson RI**. Early olfactory processing in *Drosophila*: mechanisms and principles. *Annual review of neuroscience*.  
815 2013; 36:217–241.
- 816 **Xu P**, Choo YM, Chen Z, Zeng F, Tan K, Chen TY, Cornel AJ, Liu N, Leal WS. Odorant inhibition in mosquito  
817 olfaction. *iScience*. 2019; 19:25–38.
- 818 **Yee E**, Chan R, Kosteniuk P, Chandler G, Bilotto C, Bowers J. Measurements of level-crossing statistics of con-  
819 centration fluctuations in plumes dispersing in the atmospheric surface layer. *Boundary-layer meteorology*.  
820 1995; 73(1-2):53–90.
- 821 **Yee E**, Wilson D, Zelt B. Probability distributions of concentration fluctuations of a weakly diffusive passive  
822 plume in a turbulent boundary layer. *Boundary-Layer Meteorology*. 1993; 64(4):321–354.
- 823 **Zavada A**, Buckley CL, Martinez D, Rospars JP, Nowotny T. Competition-based model of pheromone component  
824 ratio detection in the moth. *PloS one*. 2011; 6(2).
- 825 **Zhang Y**, Tsang TK, Bushong EA, Chu LA, Chiang AS, Ellisman MH, Reingruber J, Su CY. Asymmetric ephaptic  
826 inhibition between compartmentalized olfactory receptor neurons. *Nature communications*. 2019; 10(1):1–  
827 16.

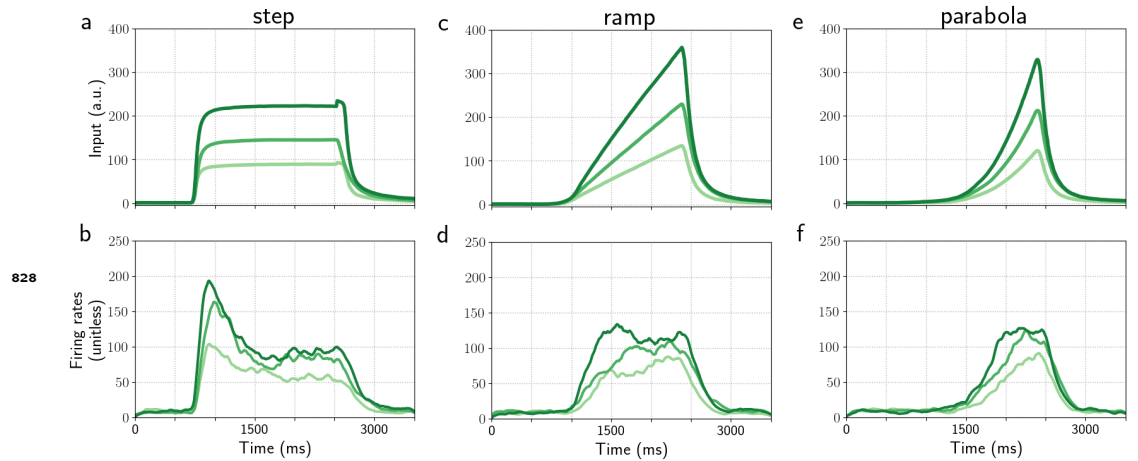

**Figure 3-Figure supplement 1.** Model ORN response to a single step (a,b), ramp (c,d), and parabola (e,f). a, c, e: Stimulus waveforms, i.e. odorant concentration profiles, as in *Kim et al. (2015)*. b, d, f: Model ORN firing rates visualized as a spike density function (SDF).

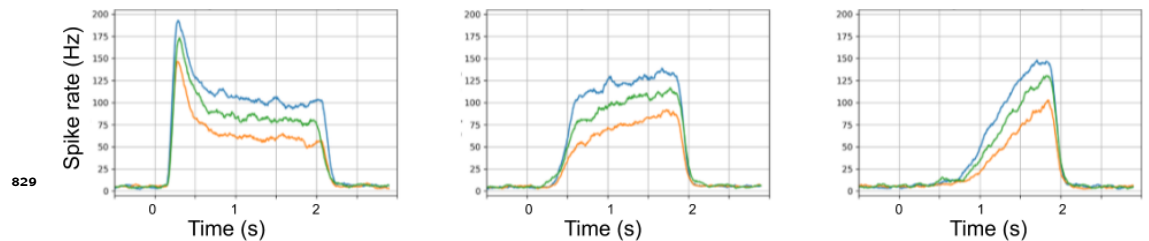

**Figure 3-Figure supplement 2.** Output of the model of Lazar and Yeh (*Lazar and Yeh, 2020*) for the Or59b receptor neuron in response to the corresponding stimulus waveforms (experimental data reported in *Kim et al. (2015)*).

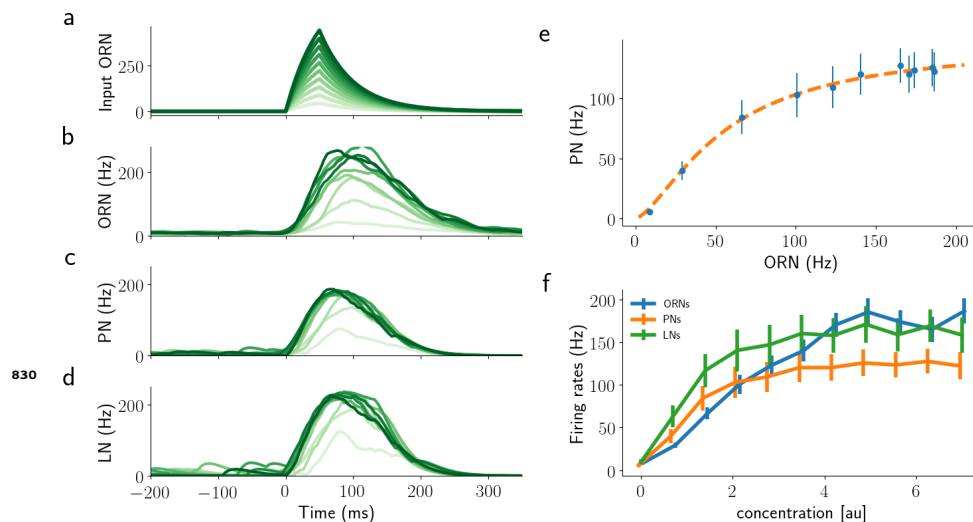

**Figure 4-Figure supplement 1.** a) 50 ms step stimuli, shade of green indicates concentration. b)-d) corresponding activity of ORNs, PNs, and LNs. Shades of green match the input concentrations. e) Average response of PNs over 50 ms against the average activity of the corresponding ORNs. The orange dashed line is the fit of the simulated data using equation eq.1 as reported in (*Olsen et al., 2010*). f) Average values for PNs, ORNs, and LNs for different values of concentration. Error bars show the SE over PNs.

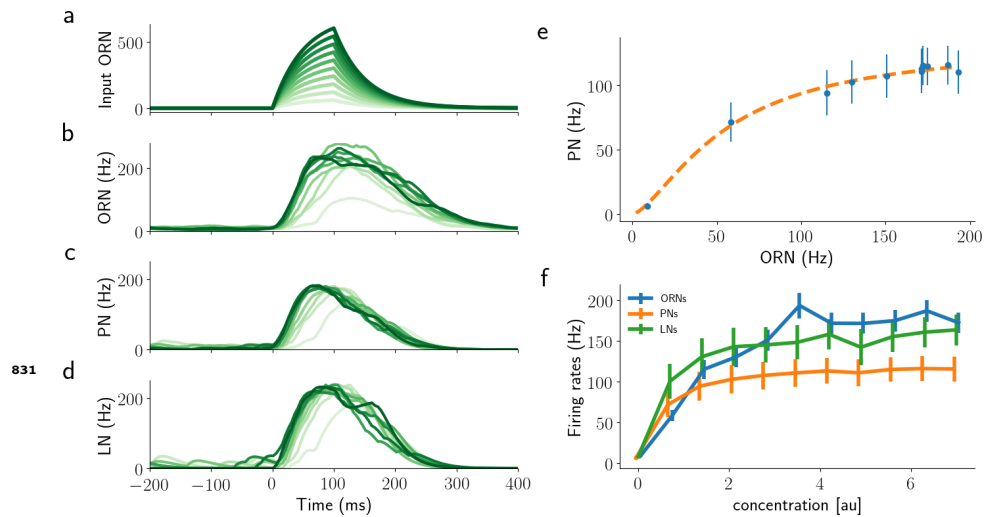

**Figure 4-Figure supplement 2.** a) 10 ms step stimuli, shade of green indicates concentration. b)-d) corresponding activity of ORNs, PNs, and LNs. Shades of green match the input concentrations. e) Average response of PNs over 10 ms against the average activity of the corresponding ORNs. The orange dashed line is the fit of the simulated data using equation eq.1 as reported in (*Olsen et al., 2010*). f) Average values for PNs, ORNs, and LNs for different values of concentration. Error bars show the SE over PNs.

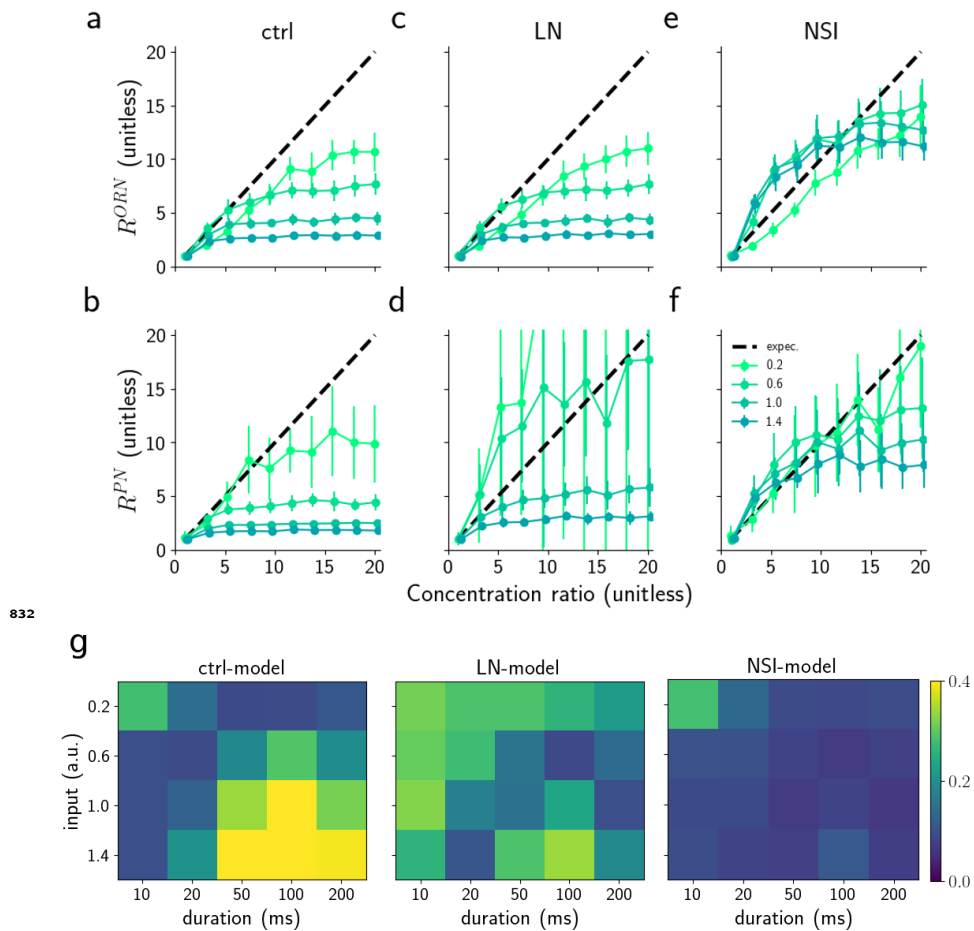

**Figure 6-Figure supplement 1.** Encoding ratio with the average PN activity. ORN (a,c,e) and PN (b,d,f) responses to a single synchronous triangular pulse of 50ms duration applied to both ORN groups. The graphs show average responses ratio ( $R^{ORN}$  and  $R^{PN}$ ), respectively, versus concentration ratio of the two odorants for four different overall concentrations (colours, see legend in f). The average PN responses would be a perfect reflection of the odorant concentration if they followed the black dashed diagonal for all concentrations. Error bars represent the semi inter-quartile range calculated over 50 trials. g) Analysis of the coding error for different values of stimulus duration (from 10 to 200ms) and concentration values (0.2 to 1.4).

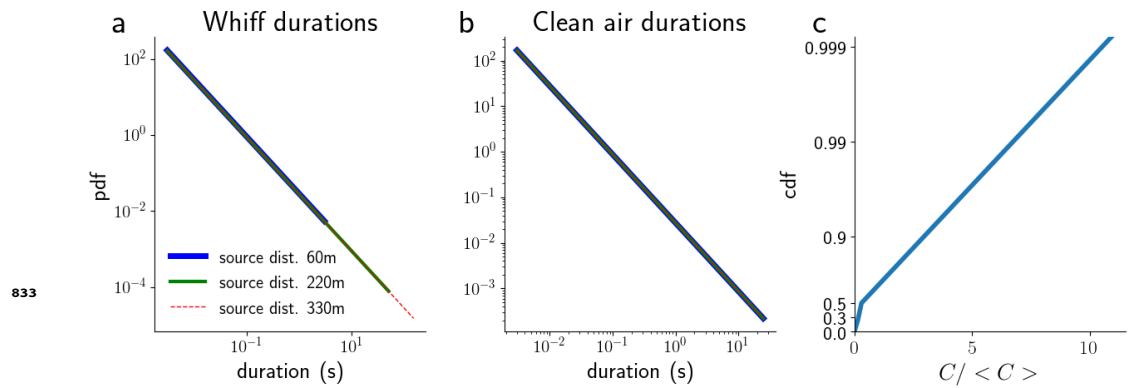

**Figure 6-Figure supplement 2.** a) Probability distribution of the whiff durations for odors emitted at distances larger than 60 m *Yee et al. (1995)*. b) Probability distribution of the blank durations for odors emitted at distances larger than 60 m *Yee et al. (1995)*. c) Probability distribution of the normalized concentration for odors emitted at 75 m distance from the source *Mylne and Mason (1991)*.

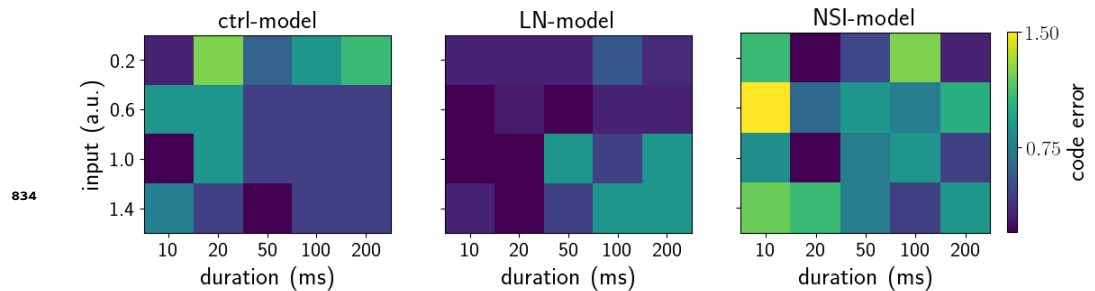

**Figure 6-Figure supplement 3.** Analysis of the coding error with mutual information for different values of stimulus duration (from 10 to 200ms) and concentration values (0.2 to 1.4). The coding error is calculated as the MI between odorant concentration and  $R^{PN}$  (see Model and methods).

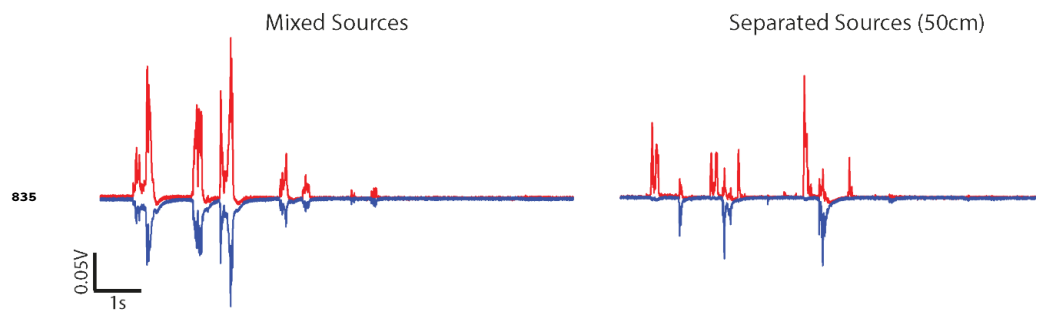

**Figure 7-Figure supplement 1.** Example concentration fluctuation time series of natural plumes for two odors emitted by a single source or two separate sources (*Erskine, 2018*).

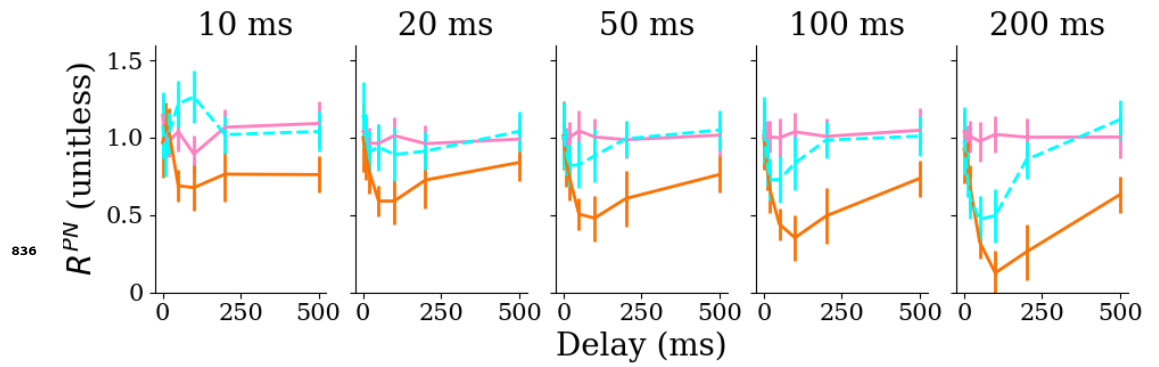

**Figure 7-Figure supplement 2.** Median ratio of the average PN responses of the two glomeruli  $R^{PN} = v_b^{PN}/v_a^{PN}$  in the three models: control model (dot dashed pink), LN model (orange continuous), and NSI model (dashed cyan) for different stimulus durations as marked on the top. Error bars represent the semi inter-quartile ranges.

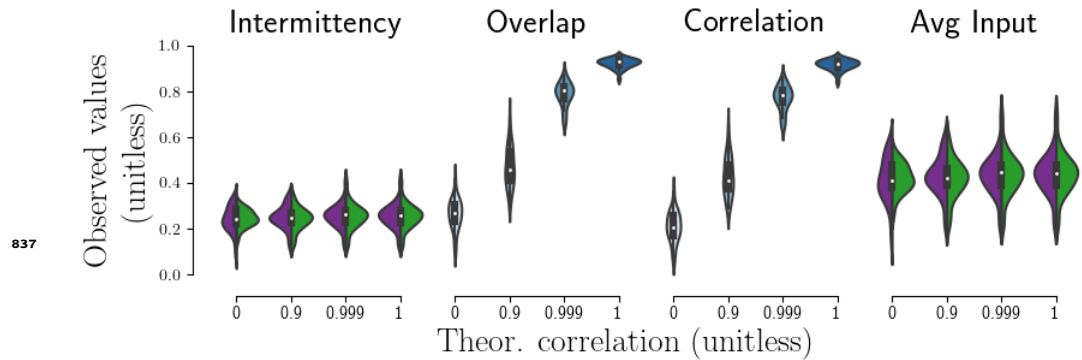

**Figure 8-Figure supplement 1.** Observed properties of the simulated plumes as a function of the intended correlation between plumes averaged over 200 s. Intermittency and average input plots show the values for the two plumes (green and purple).

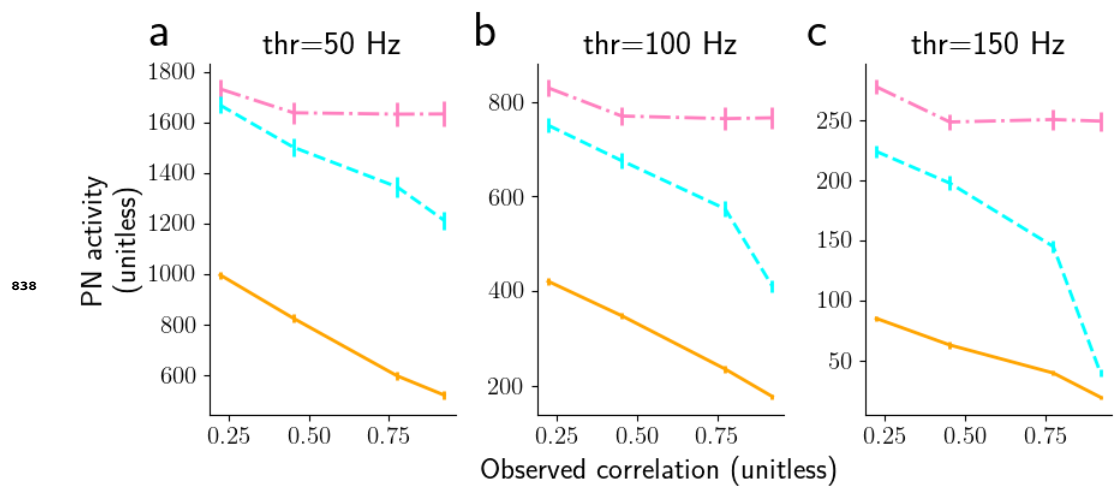

**Figure 8-Figure supplement 2.** Panels a-c) show the total PN activity above 50, 100, 150 Hz, respectively, for 3 ms maximum whiff durations.

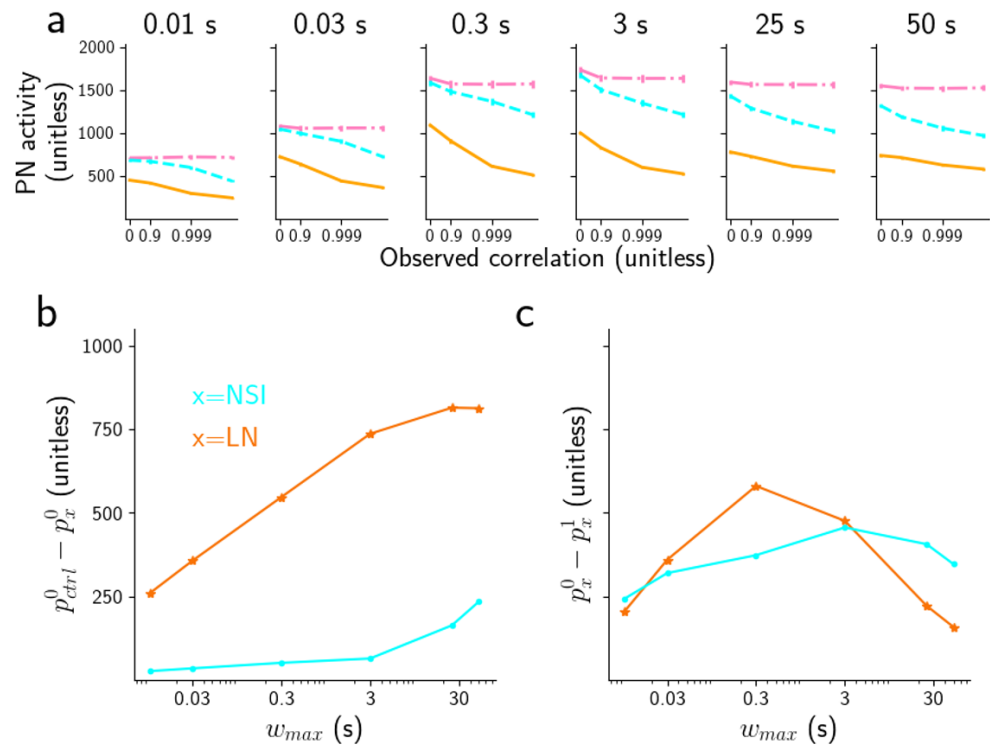

**Figure 9-Figure supplement 1.** a) peak PN threshold 50Hz for different subsets of whiff durations (from 0.01 to 50 s) for the three models: control model (dot dashed pink), LN model (orange continuous), and NSI model (dashed cyan). Note that the horizontal axis has a log-scale.

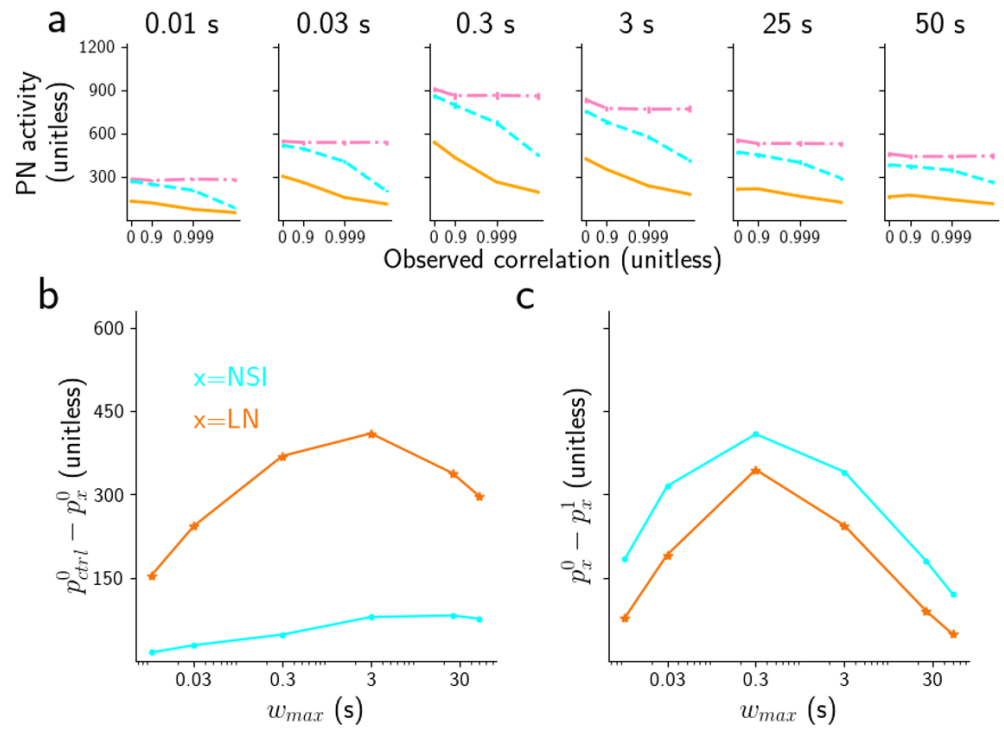

**Figure 9-Figure supplement 2.** a) peak PN threshold 100Hz for different subsets of whiff durations (from 0.01 to 50 s) for the three models: control model (dot dashed pink), LN model (orange continuous), and NSI model (dashed cyan). Note that the horizontal axis has a log-scale.
